# Supplementary material for: A catalyst-free, one-pot multicomponent synthesis of spiro-benzimidazoquinazolinones via a Knoevenagel–Michael-imine pathway: a microwave assisted approach
Source: Royal Society of Chemistry journal article supplement (doi:10.1039/c6ra05322j), 2016-01-01

## SUPPORTING INFORMATION

**DOI:**

**Title: A catalyst-free, one-pot multicomponent synthesis of spiro-benzimidazoquinazolinones via Knoevenagel-Michael-Imine pathway: A microwave assisted approach**

**Author(s): Preeti Maloo, Tapta Kanchan Roy, Devesh M. Sawant <sup>a</sup>, Ram T. Pardasani <sup>b</sup>, Manikrao M. Salunkhe**

| <b>Sr. No</b> | <b>Table of contents</b>                                                                       | <b>Page No</b> |
|---------------|------------------------------------------------------------------------------------------------|----------------|
| 1             | General Considerations                                                                         | 1              |
| 2             | Detailed results of Screening                                                                  | 2              |
| 3             | Control experiment                                                                             | 5              |
| 4             | Crystal data parameters for compounds <b>4a</b>                                                | 6              |
| 5             | Crystallography data for compound <b>4a</b> and <b>7a</b>                                      | 8              |
| 6             | Copies of <sup>1</sup> H, <sup>13</sup> C, DEPT and HRMS spectra for compounds <b>4(a - c)</b> | 9              |
| 7             | Copies of <sup>1</sup> H, <sup>13</sup> C, DEPT and HRMS spectra for compounds <b>7(a - n)</b> | 15             |
| 8             | Optimized Transition States ( <b>T.S.-I and III</b> )                                          | 43             |

## 1. General Considerations:-

All chemicals were purchased from Sigma Aldrich and all solvents were analytically pure grade were used as received without any further purification. A CEM microwave synthesizer of (Model-Discover System-908010)voltage 180/264 and frequency 50/60Hz, operating by utilizing 700 W with maximum microwave power level of 300 W, was employed for the synthesis work Some of the derivatives of compound **5** were synthesized according to literature methods.<sup>29</sup>Analytical TLC were performed using 2.5X 5 cm plates coated with 0.25 mm thickness of silica gel 60F-254 Merck and visualization was accomplished with UV light, iodine and or KMnO<sub>4</sub> staining.<sup>1</sup>HNMR, <sup>13</sup>CNMR and DEPT-135 spectra were obtained from Bruker's 500 spectrometer (at 500 MHz and 125 MHz respectively) and are reported in ppm ( $\delta$ ) with respect to tetramethylsilane (TMS, 0.00 ppm) and solvent (DMSO-d<sub>6</sub> = 39.43 ppm)as an internal standard. The abbreviations are used: s=singlet, d=doublet, t=triplet, q=quartet, dd=double doublet, m=multiplet, br.s=broad singlet &br=broad signal. Melting points were recorded on Buchi M-565 melting point apparatus and are uncorrected. Mass spectra were recorded on LCMS MS spectrometer Advion, USA using Electron Spray Ionization (ESI) in Positive/Negative mode. IR data were recorded on Perkin Elmer FT-IR spectrometer using KBr pellets. All the computational analysis has been carried out using Gaussian 09 program suit.

## 2. Detailed results of Screening

### 2.1 *Table S1: Screening of Catalyst*

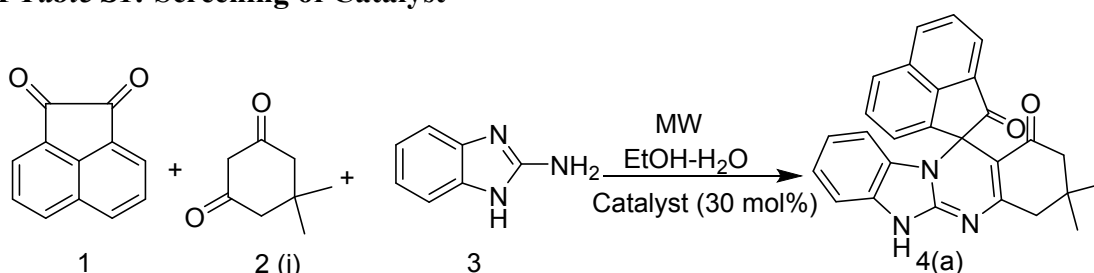

| S.No. | Catalyst             | Conditions    | Yield (%) <sup>a</sup> |
|-------|----------------------|---------------|------------------------|
| 1.    | p-TSA                | 160 °C, 5 min | 20                     |
| 2.    | Yb(OTf) <sub>3</sub> | 160 °C, 5 min | No reaction            |
| 3.    | Et <sub>3</sub> N    | 160 °C, 5min  | 48                     |
| 4.    | PEG                  | 160 °C, 5 min | 30                     |

<sup>a</sup>Isolated yield

### 2.2 *Table S2: Solvent effect*

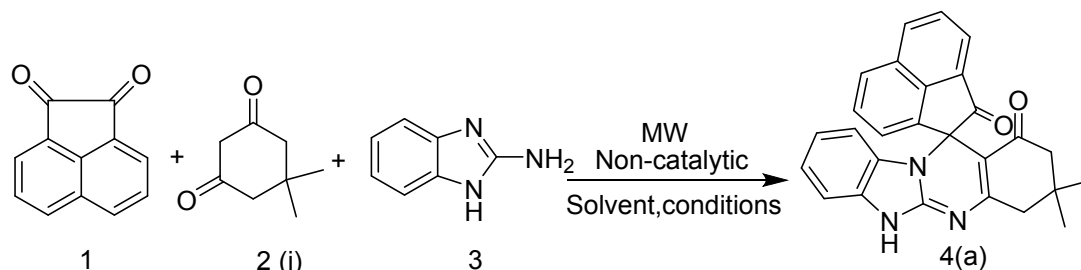

| S.No. | Solvent               | Conditions         | Yield (%) <sup>a</sup> |
|-------|-----------------------|--------------------|------------------------|
| 1     | EtOH-H <sub>2</sub> O | 160°C, 5min        | 55                     |
| 2     | H <sub>2</sub> O      | 160°C, 5min        | 65                     |
| 3     | Methanol              | 160°C, 5 min       | 47                     |
| 4     | <b>Ethanol</b>        | <b>160°C, 5min</b> | <b>75</b>              |

<sup>a</sup>Isolated yield

### 2.3 Table S3: Temperature effect

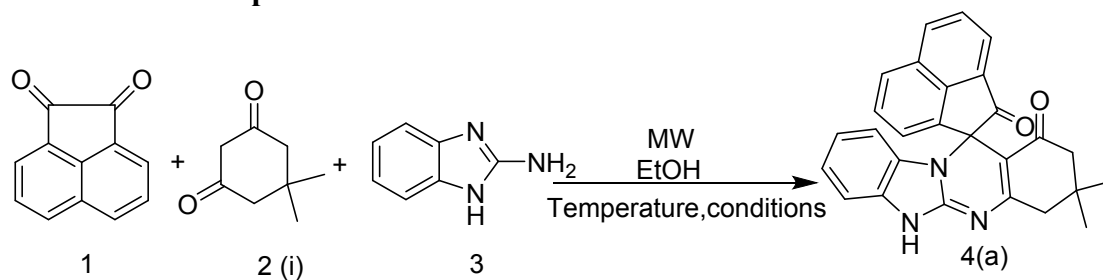

| S.No.    | Temperature   | Conditions | Yield (%) <sup>a</sup> |
|----------|---------------|------------|------------------------|
| 1        | 140 °C        | 5min       | 50                     |
| 2        | 150 °C        | 5min       | 55                     |
| <b>3</b> | <b>160 °C</b> | 5min       | <b>75</b>              |
| 4        | 170 °C        | 5min       | 70                     |
| 5        | 180 °C        | 5min       | 60                     |

<sup>a</sup>Isolated yield

### 2.4 Table S4: Time effect

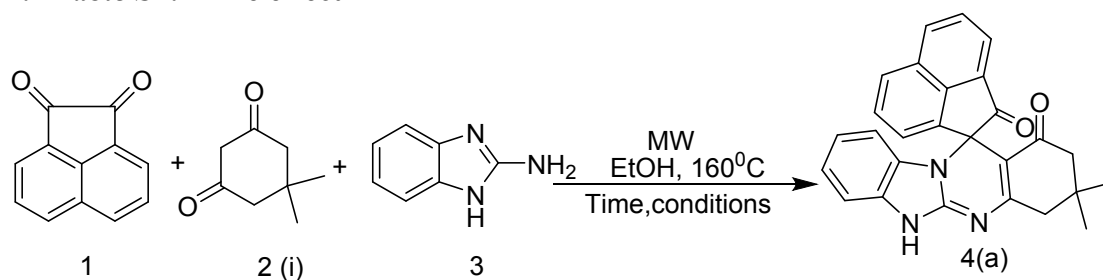

| S.No.    | Time (min) | Yield (%) <sup>a</sup> |
|----------|------------|------------------------|
| 1        | 3          | 65                     |
| <b>2</b> | <b>5</b>   | <b>75</b>              |
| 3        | 7          | 74                     |
| 4        | 9          | 72                     |
| 5        | 11         | 70                     |
| 6        | 15         | 40                     |

<sup>a</sup>Isolated yield

### 2.5 Table S5: Power effect

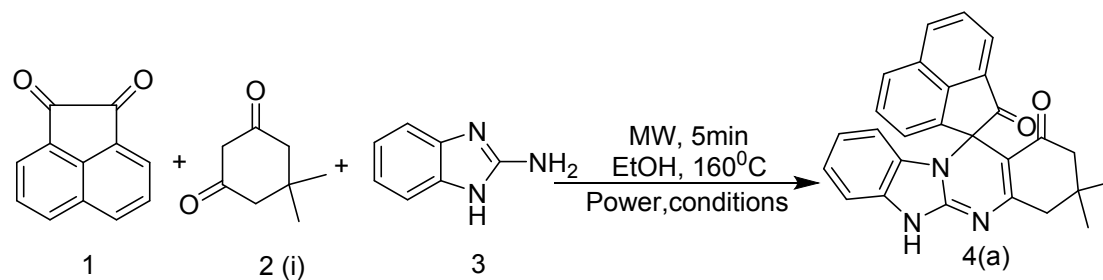

| S.No.    | Power (watt) | Yield (%) <sup>a</sup> |
|----------|--------------|------------------------|
| 1        | 120          | 10                     |
| 2        | 150          | 54                     |
| <b>3</b> | <b>180</b>   | <b>75</b>              |

### 2.6 Table S6: Screening of Catalyst

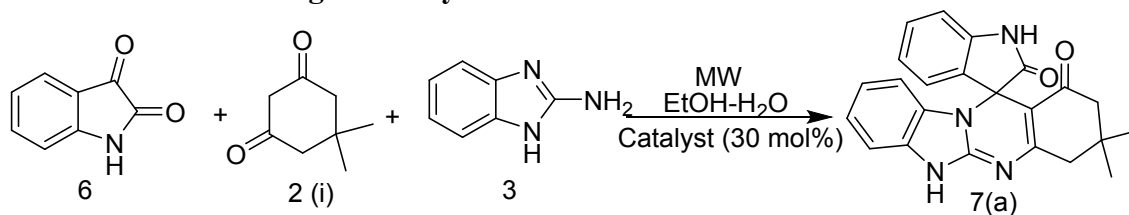

| S.No. | Catalyst             | Conditions    | Yield (%) <sup>a</sup> |
|-------|----------------------|---------------|------------------------|
| 1.    | p-TSA                | 160 °C, 5 min | 40                     |
| 2.    | Yb(OTf) <sub>3</sub> | 160 °C, 5 min | No reaction            |
| 3.    | Et <sub>3</sub> N    | 160 °C, 5min  | 10                     |
| 4.    | PEG                  | 160 °C, 5 min | 20                     |

<sup>a</sup>Isolated yield

### 2.7 Table S7: Solvent effect

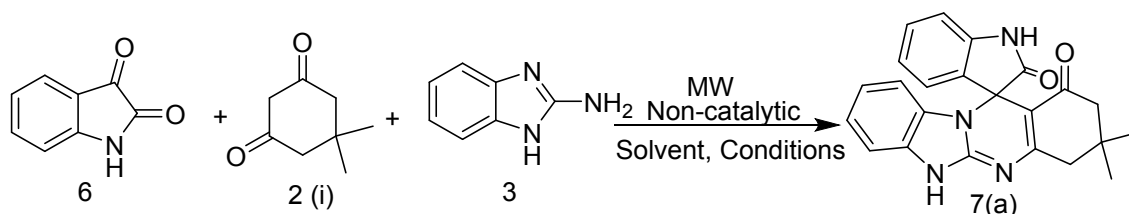

| S.No. | Solvent               | Conditions   | Yield (%) <sup>a</sup> |
|-------|-----------------------|--------------|------------------------|
| 1     | EtOH-H <sub>2</sub> O | 160°C, 5min  | 20                     |
| 2     | H <sub>2</sub> O      | 160°C, 5min  | 65                     |
| 3     | Methanol              | 160°C, 5 min | 10                     |
| 4     | Ethanol               | 160°C, 5 min | 75                     |

<sup>a</sup>Isolated yield

### 2.8 Table S8: Temperature effect

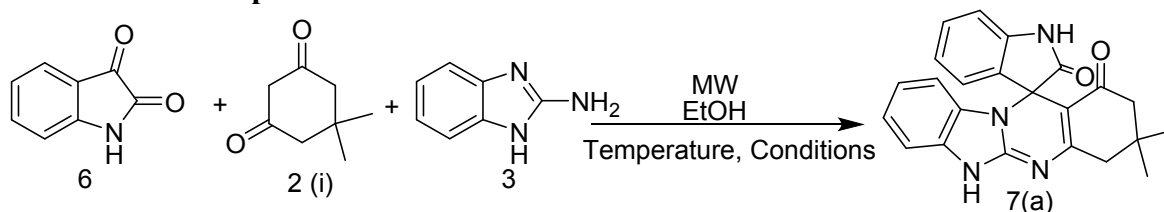

| S.No. | Temperature | Conditions | Yield (%) <sup>a</sup> |
|-------|-------------|------------|------------------------|
| 1     | 140 °C      | 5min       | 50                     |
| 2     | 160 °C      | 5 min      | 75                     |
| 3     | 180 °C      | 5 min      | 70                     |

<sup>a</sup>Isolated yield

### 2.9 Table S9: Time effect

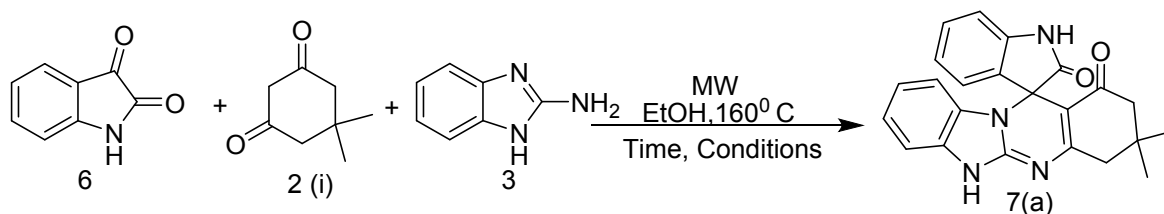

| S.No. | Time (min) | Yield (%) <sup>a</sup> |
|-------|------------|------------------------|
| 1     | 3          | 65                     |
| 2     | 5          | 75                     |
| 3     | 7          | 30                     |

<sup>a</sup>Isolated yield

### 3. Control experiment:

We designed control experiments to isolate intermediate **5**, by the Knoevenagel condensation reaction of compound **1** and **2(i)** as shown in scheme A. For this reaction, was carried out using *p*-TSA as catalyst under ethanol reflux and after 1 hr a new non-polar spot appeared on TLC. We then isolated and characterised that spot as intermediate **5**, by HRMS and carried out its subsequent reaction with compound **3** under standard condition. Further, progress of the reaction was then monitored on TLC and product spot first appeared after 2 hrs and then its intensity goes on increasing and intermediate spot diminishes with time and after 12 hrs no intermediate left on TLC and product spot gets intensified as shown in Table 1 of manuscript.

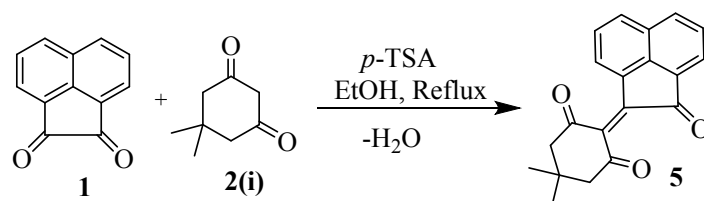

Scheme *S1*: Control Experiment for synthesis of intermediate **5**

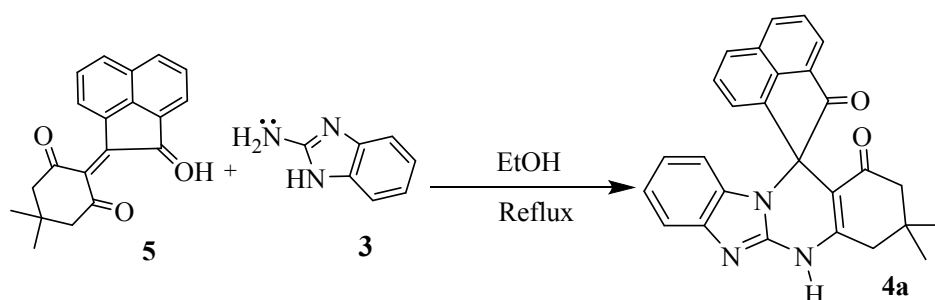

Scheme *S2*: Control Experiment for synthesis of product **4a**

#### 4. Crystal data parameters for compounds 4a

---

| Compound                                                                  | 4a                                                              | 6a                                                              |
|---------------------------------------------------------------------------|-----------------------------------------------------------------|-----------------------------------------------------------------|
| Formula                                                                   | C <sub>27</sub> H <sub>21</sub> N <sub>3</sub> O <sub>2</sub>   | C <sub>23</sub> H <sub>20</sub> N <sub>4</sub> O <sub>2</sub>   |
| Formula weight                                                            | 419.47                                                          | 384.43                                                          |
| Crystal system                                                            | Triclinic                                                       | Triclinic                                                       |
| Space group                                                               | <i>P</i> -1                                                     | <i>P</i> -1                                                     |
| Temperature (K)                                                           | 100(2)                                                          | 100(2)                                                          |
| <i>a</i> (Å)                                                              | 9.0977(4)                                                       | 9.2047(4)                                                       |
| <i>b</i> (Å)                                                              | 11.2713(5)                                                      | 14.1206(7)                                                      |
| <i>c</i> (Å)                                                              | 11.4682(5)                                                      | 16.6580(8)                                                      |
| $\alpha$ (°)                                                              | 118.8560(11)                                                    | 75.9437(14)                                                     |
| $\beta$ (°)                                                               | 92.1720(13)                                                     | 74.4957(14)                                                     |
| $\gamma$ (°)                                                              | 91.3380(12)                                                     | 87.8667(15)                                                     |
| Volume (Å <sup>3</sup> )                                                  | 1028.06(8)                                                      | 2022.99(17)                                                     |
| <i>Z</i>                                                                  | 2                                                               | 2                                                               |
| 2 $\theta$ range for data collection (°)                                  | 5.88 to 50.49                                                   | 4.41 to 56.786                                                  |
| Reflections collected/unique                                              | 15709 / 3708                                                    | 31479 / 10157                                                   |
| <i>R</i> <sub>int</sub> / <i>R</i> <sub>sigma</sub>                       | 0.0339 / 0.0415                                                 | 0.0747/0.1121                                                   |
| Data/restraints/parameters                                                | 3708 / 0 / 295                                                  | 10157/0/527                                                     |
| Goodness-of-fit on F <sup>2</sup>                                         | 1.055                                                           | 0.967                                                           |
| Final <i>R</i> indices [ <i>I</i> > 2 $\sigma$ ( <i>I</i> )] <sup>a</sup> | <i>R</i> <sub>1</sub> = 0.0400, <i>wR</i> <sub>2</sub> = 0.0955 | <i>R</i> <sub>1</sub> = 0.0660, <i>wR</i> <sub>2</sub> = 0.1478 |
| <i>R</i> indices (all data) <sup>a</sup>                                  | <i>R</i> <sub>1</sub> = 0.0508, <i>wR</i> <sub>2</sub> = 0.1012 | <i>R</i> <sub>1</sub> = 0.1303, <i>wR</i> <sub>2</sub> = 0.1647 |
| Largest residuals (e.Å <sup>-3</sup> )                                    | 0.22 and -0.27                                                  | 0.33 and -0.39                                                  |

---

## 6. Copies of $^1\text{H}$ , $^{13}\text{C}$ , DEPT and HRMS spectra for compounds 4(a -c)

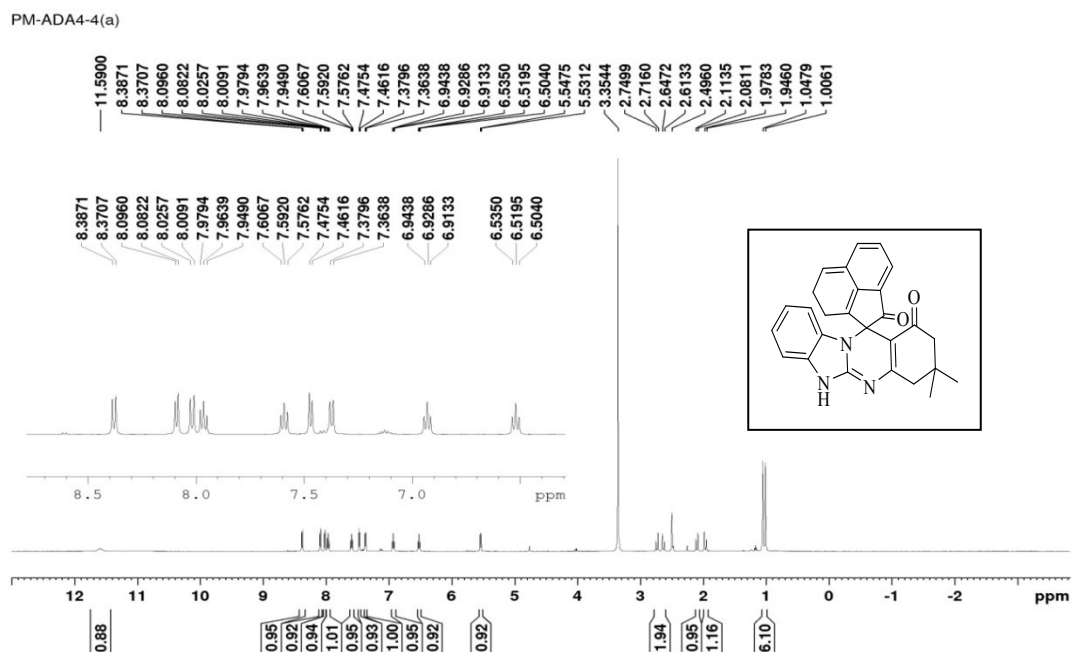

$^1\text{H}$  NMR spectrum of compound 4a

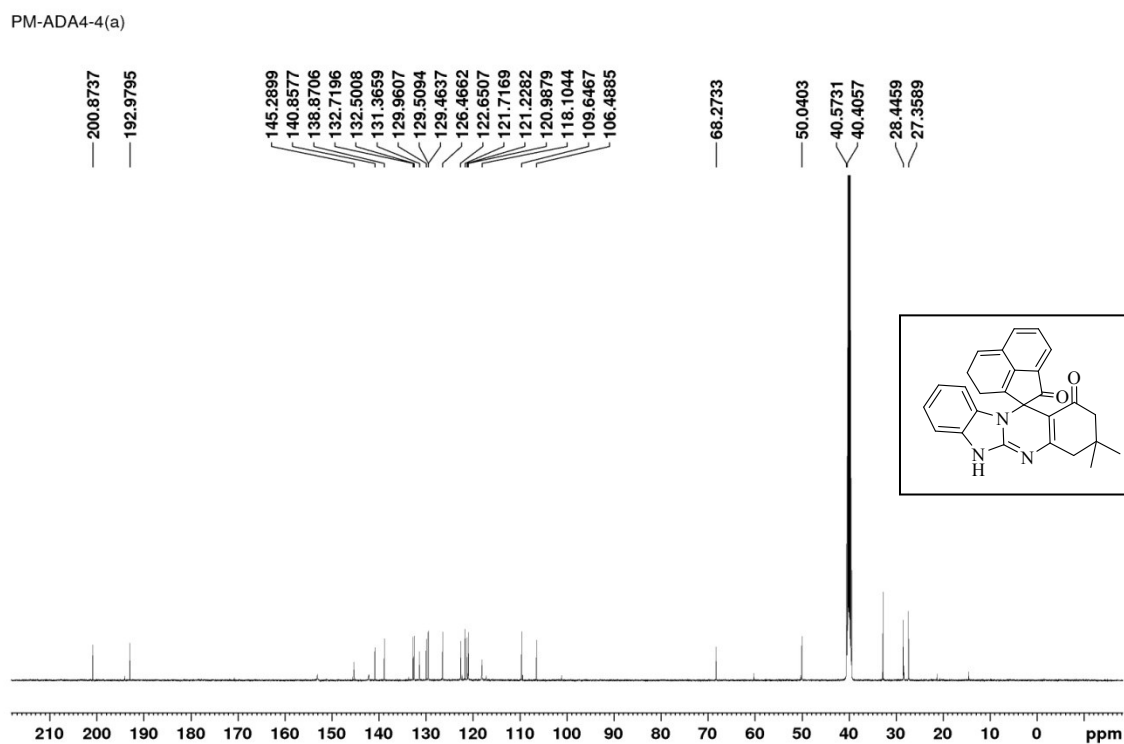

$^{13}\text{C}$  NMR spectrum of compound 4a

PM-ADI-4-4(a)

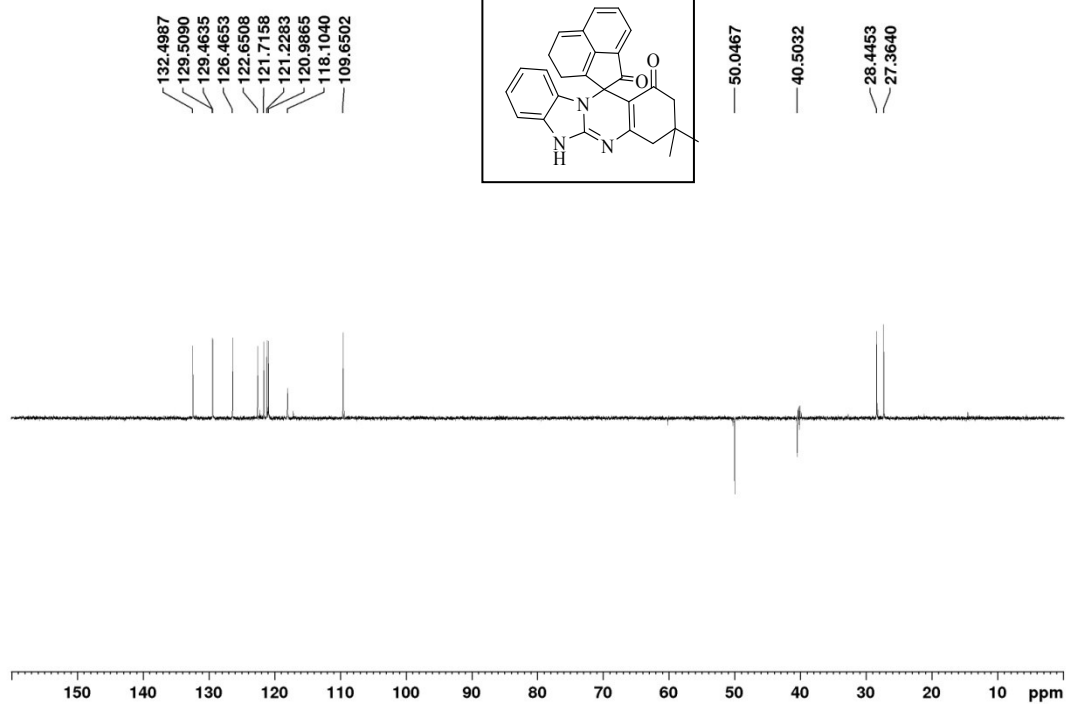

DEPT-135 spectrum of compound 4a

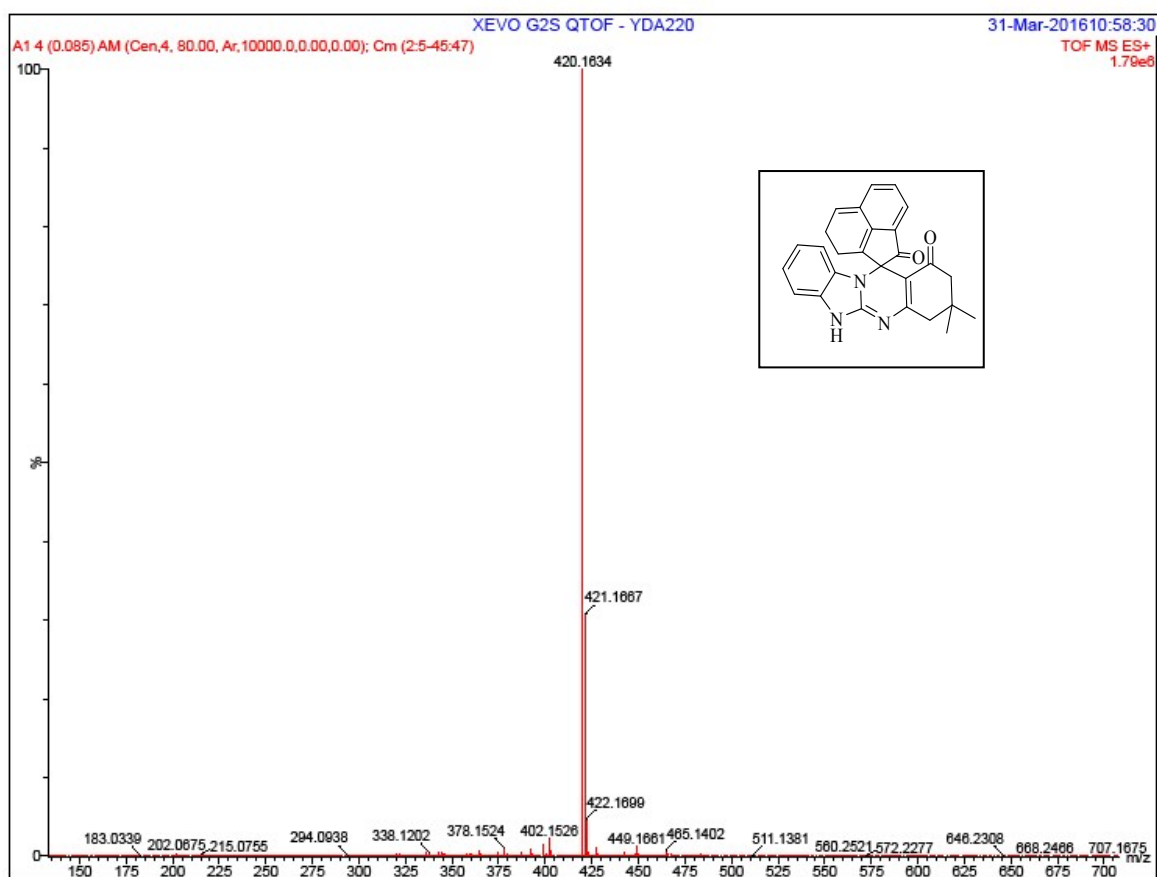

HRMS spectrum of compound 4a



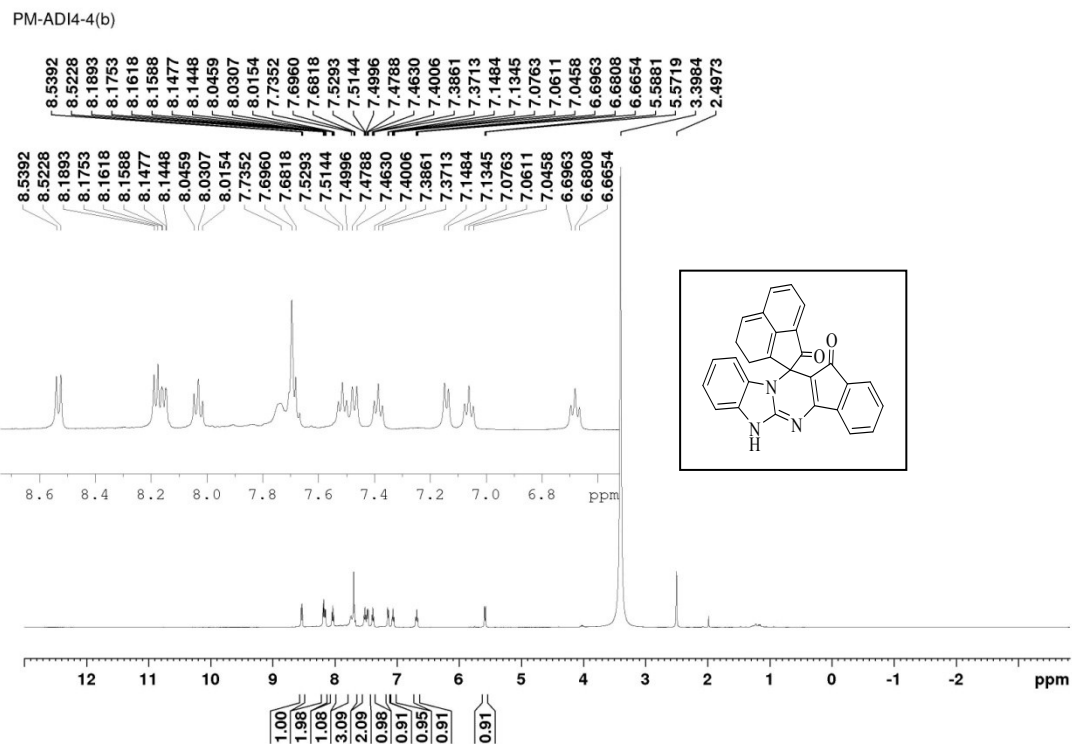

<sup>1</sup>H NMR spectrum of compound 4b

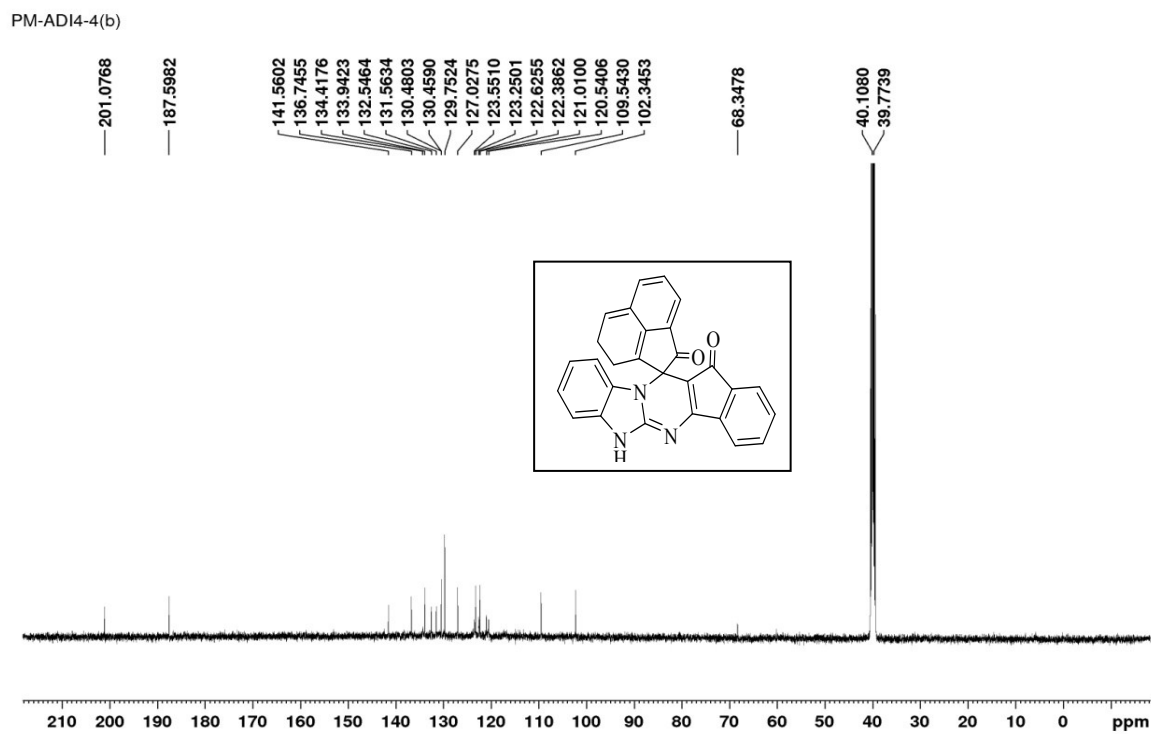

<sup>13</sup>C NMR spectrum of compound 4b

PM-ADI4-4(b)

133.9472  
132.5479  
131.5691  
129.7538  
127.0288  
123.5371  
123.2557  
122.6410  
122.3901  
121.0255  
120.5539  
109.5412

40.3552  
40.1876  
40.0201

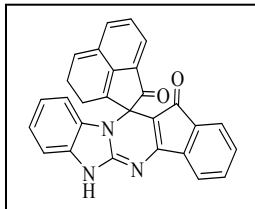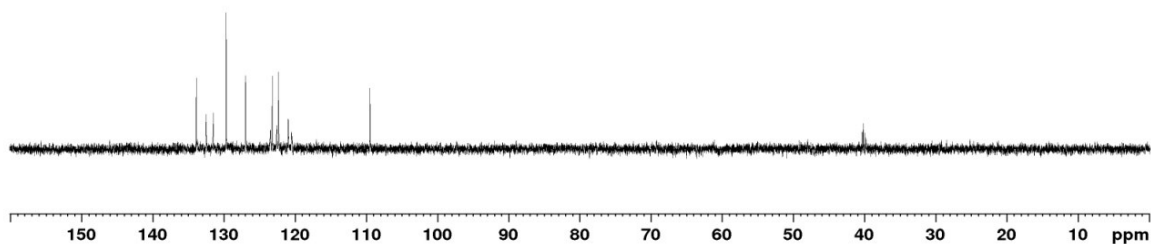

DEPT-135 spectrum of compound 4b

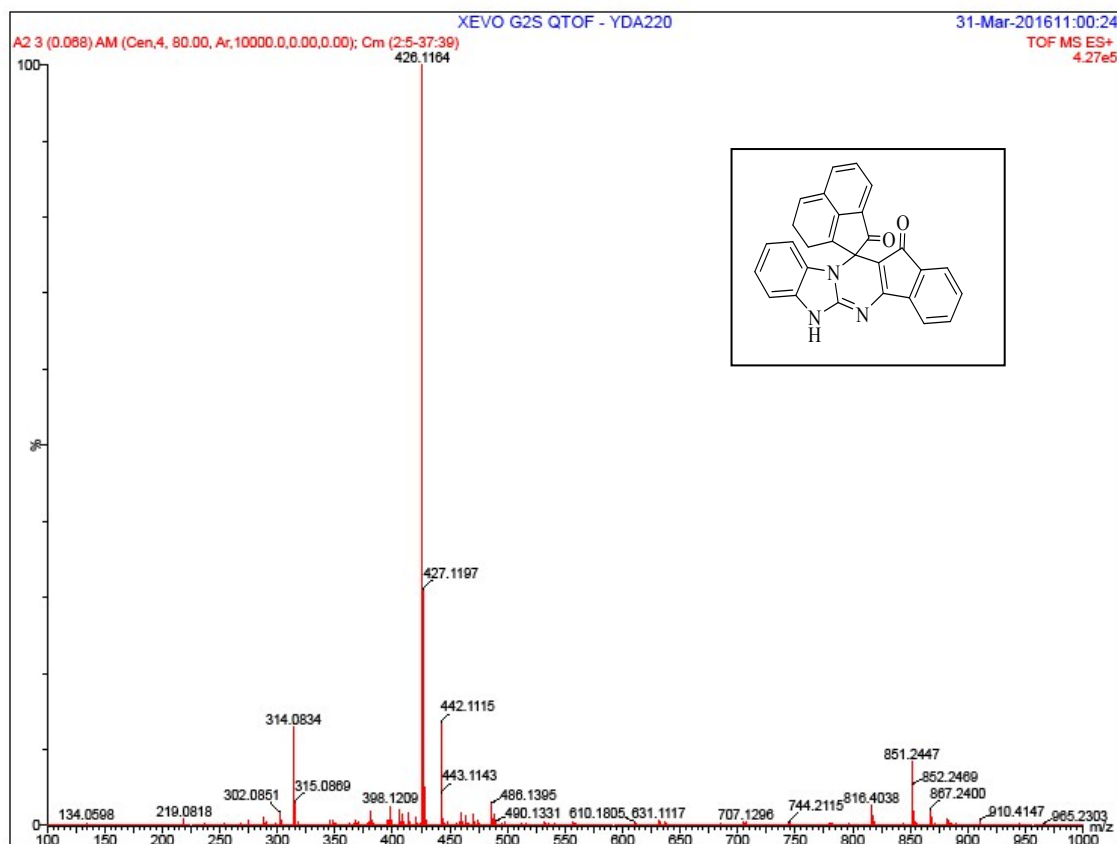

HRMS spectrum of compound 4b



PM-AD14-4(c)

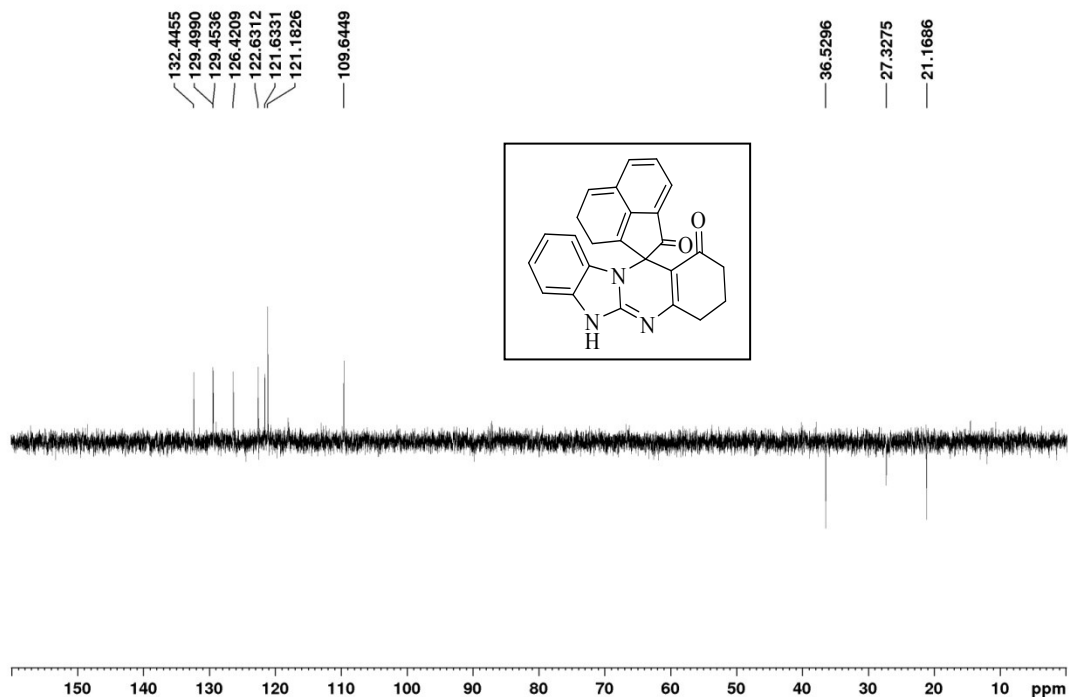

DEPT-135 NMR spectrum of compound 4c

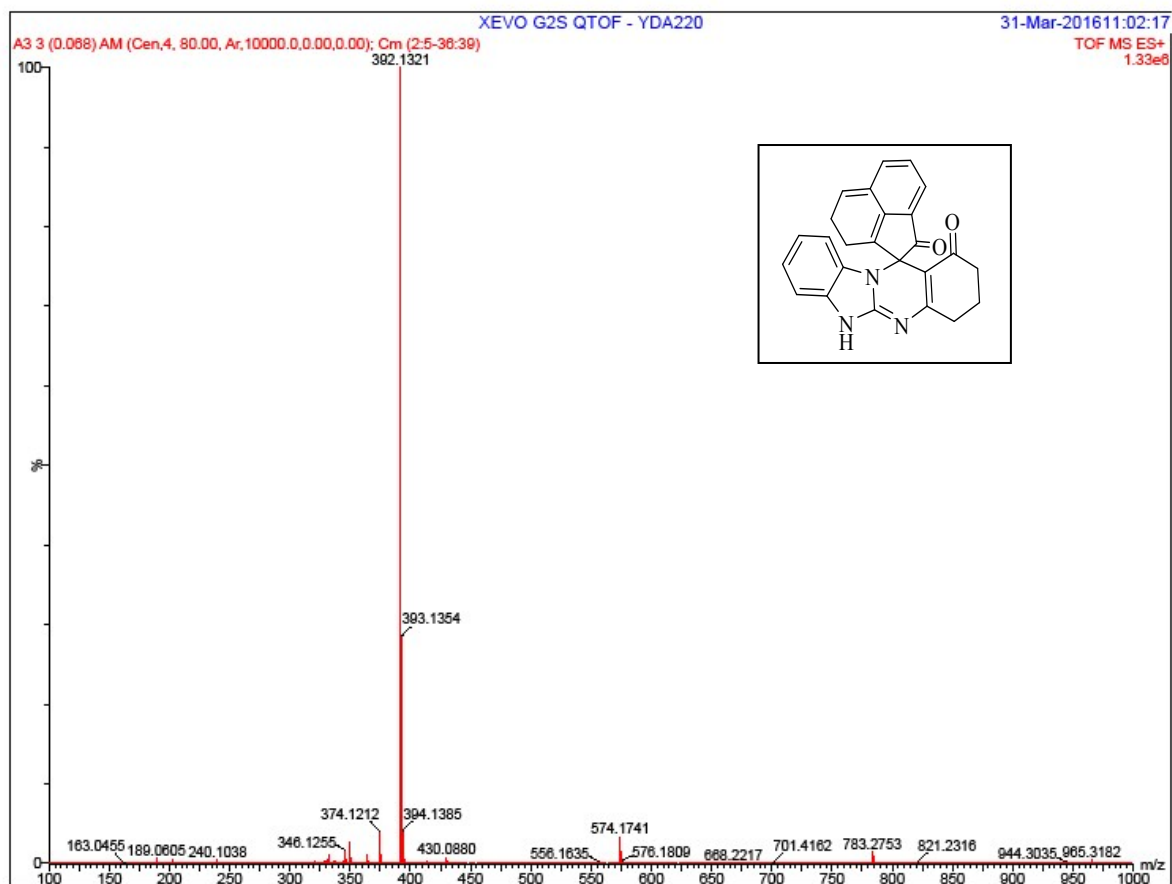

HRMS spectrum of compound 4c

## 7. Copies of $^1\text{H}$ , $^{13}\text{C}$ , DEPT and HRMS spectra for compounds 7(a-n)

PM-ADI4-4(d)

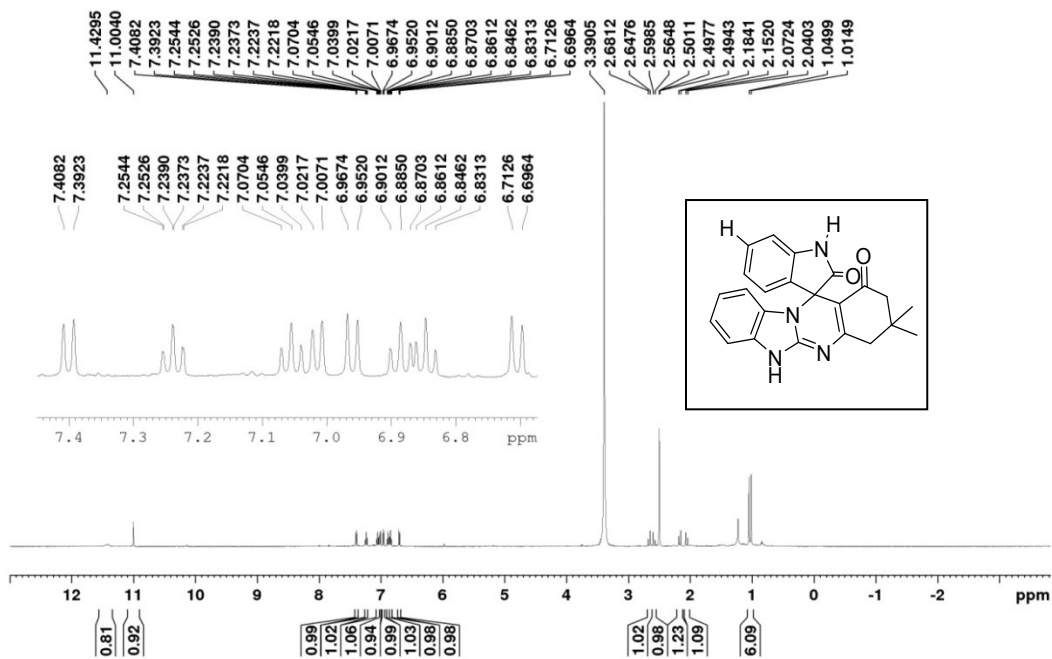

$^1\text{H}$  NMR spectrum of compound 7a

1

PM-ADI4-4(d)

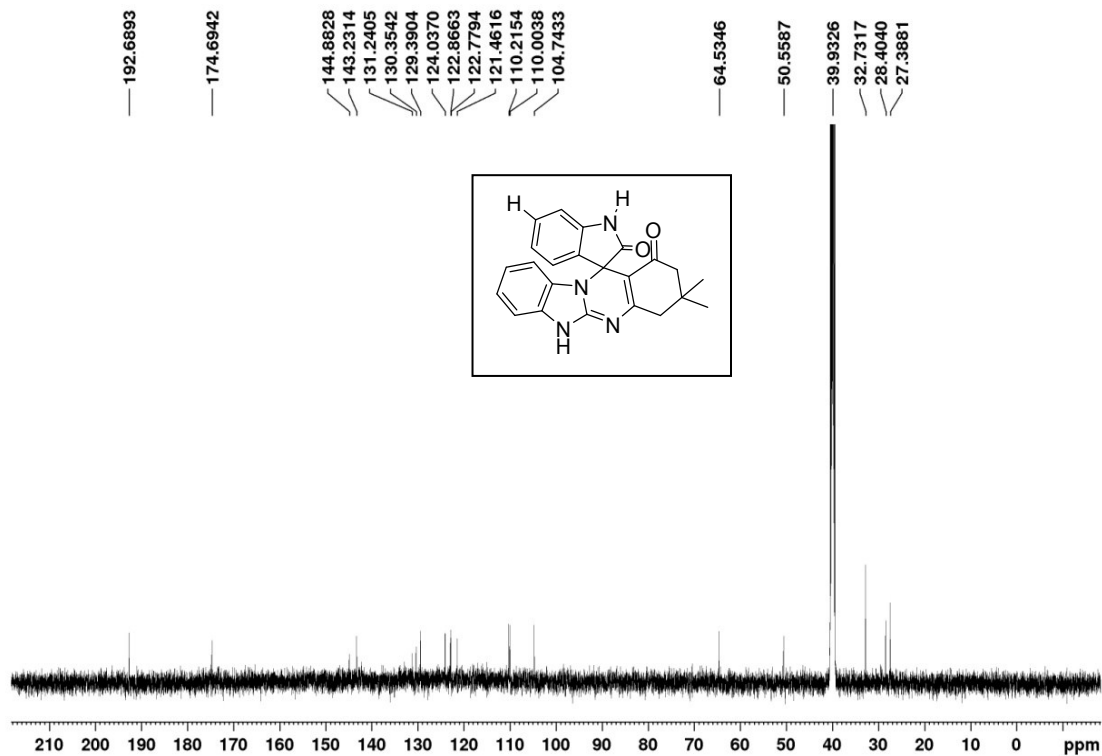

$^{13}\text{C}$  NMR spectrum of compound 7a

13

PM-AD14-4(d)

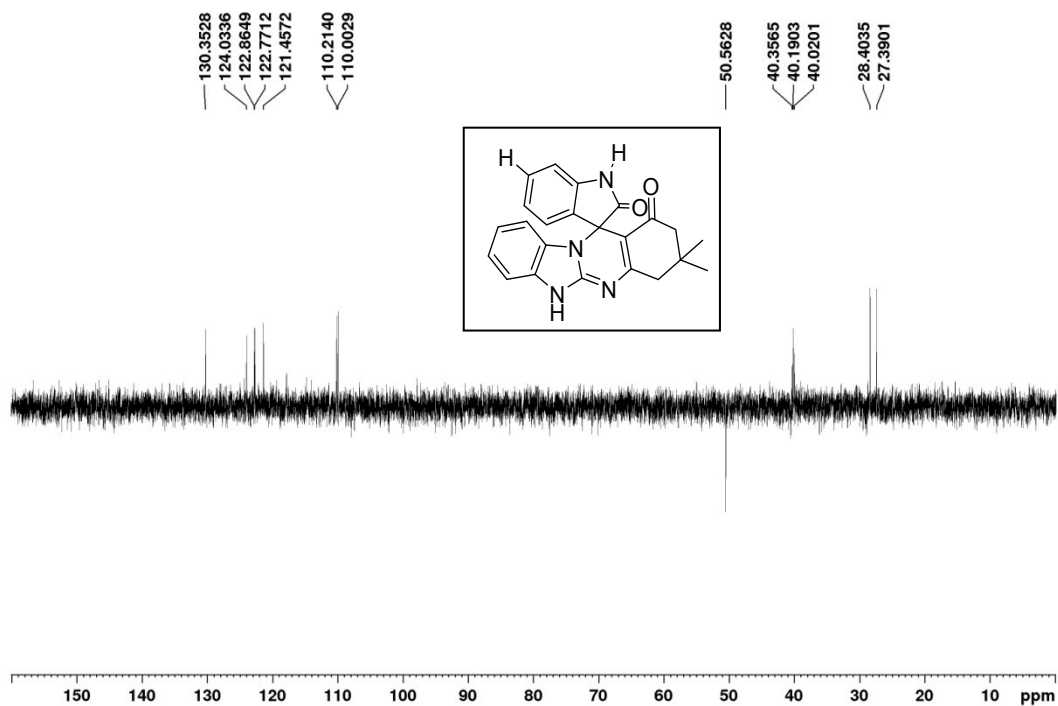

DEPT-135 NMR spectrum of compound 7a

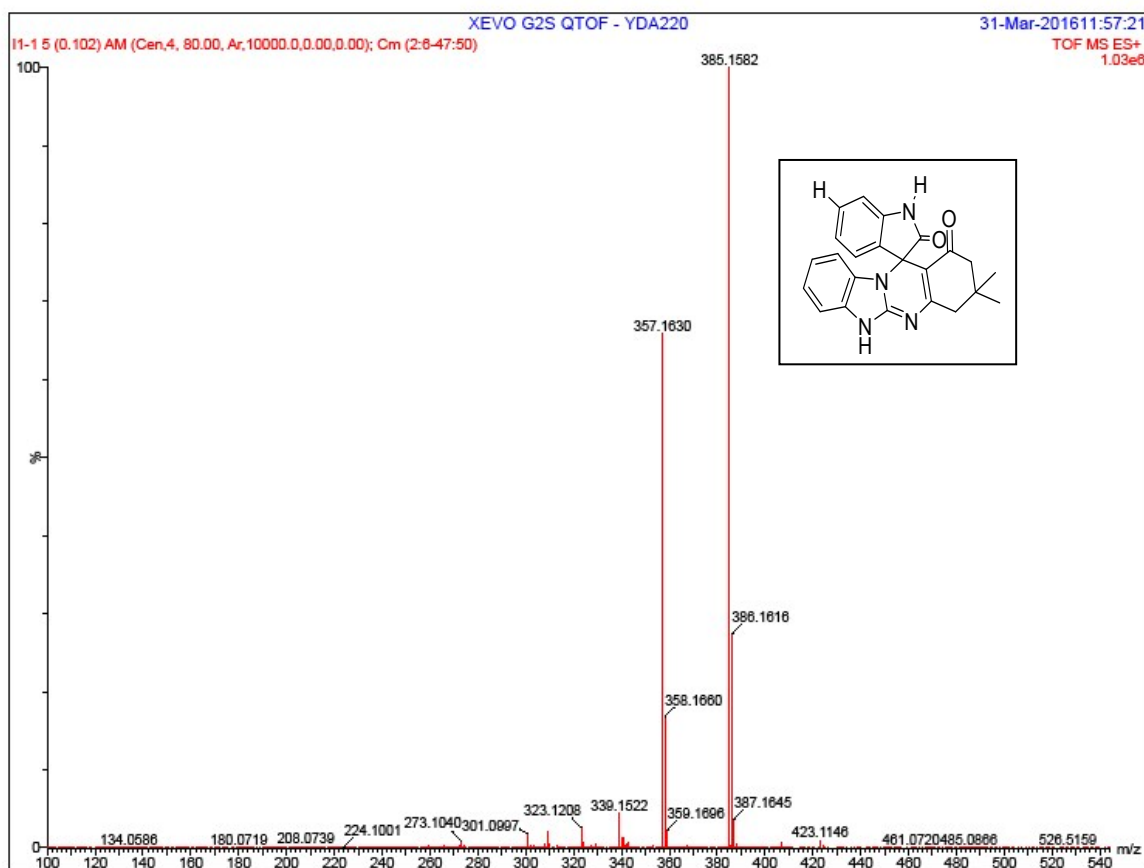

HRMS spectrum of compound 7a

PM-ADA4-4(e)

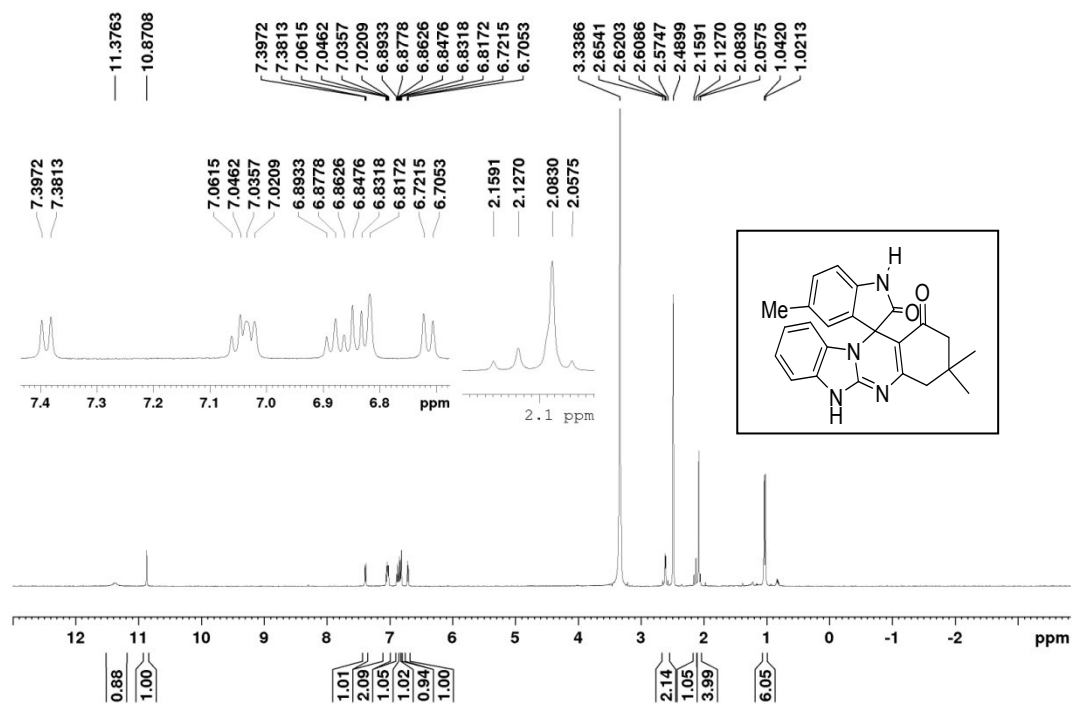

<sup>1</sup>H NMR spectrum of compound 7b

PM-ADA4-4(e)

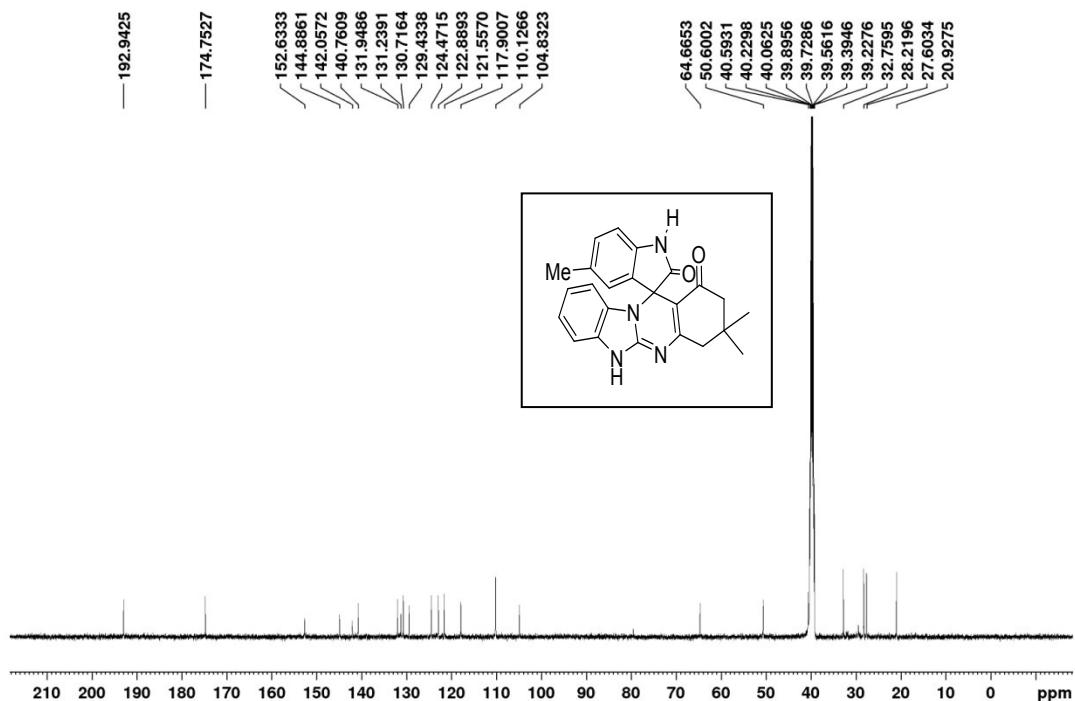

<sup>13</sup>C NMR spectrum of compound 7b

PM-ADA4-4(e)

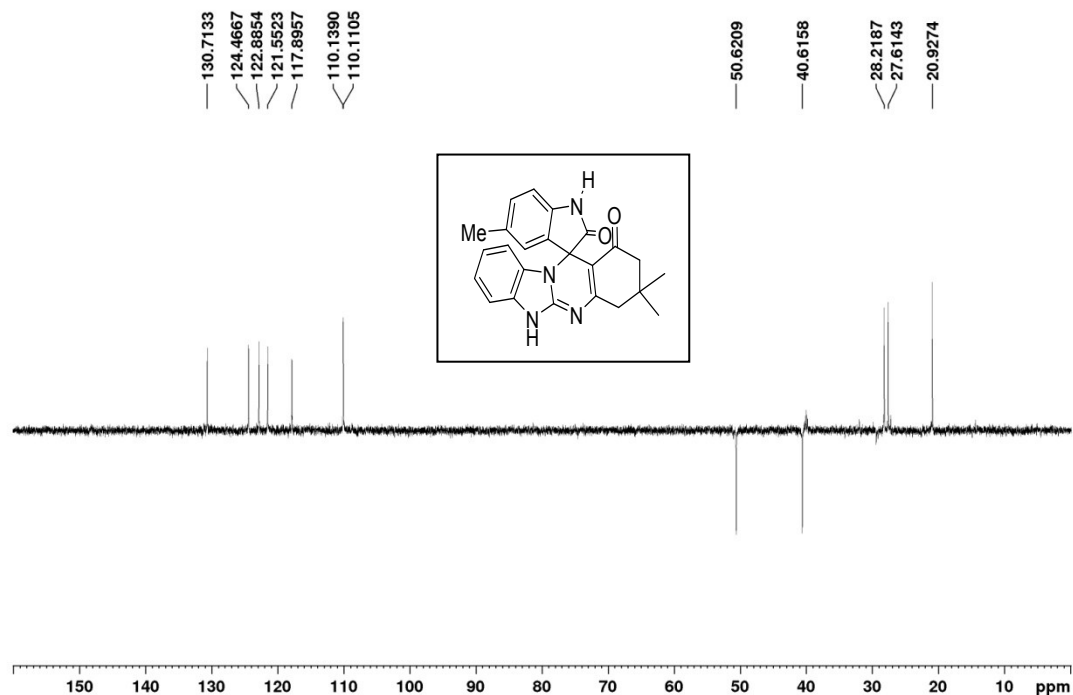

DEPT-135 NMR spectrum of compound 7b

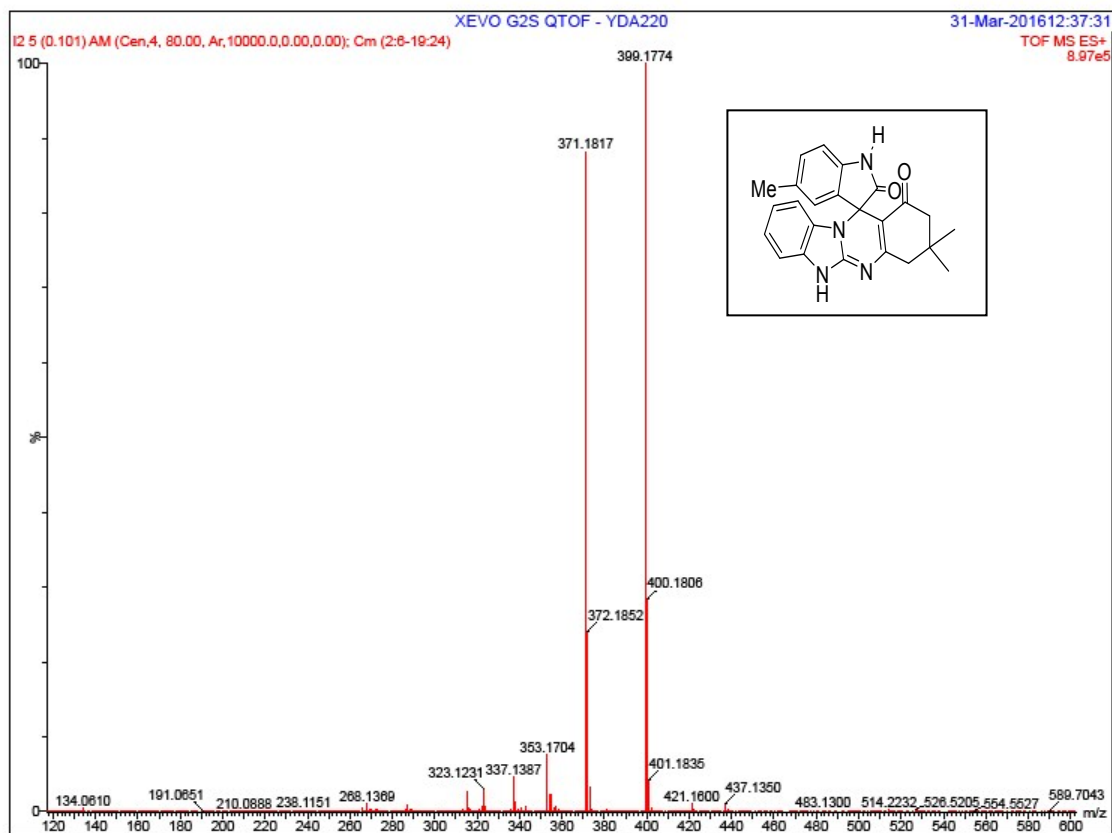

HRMS spectrum of compound 7b



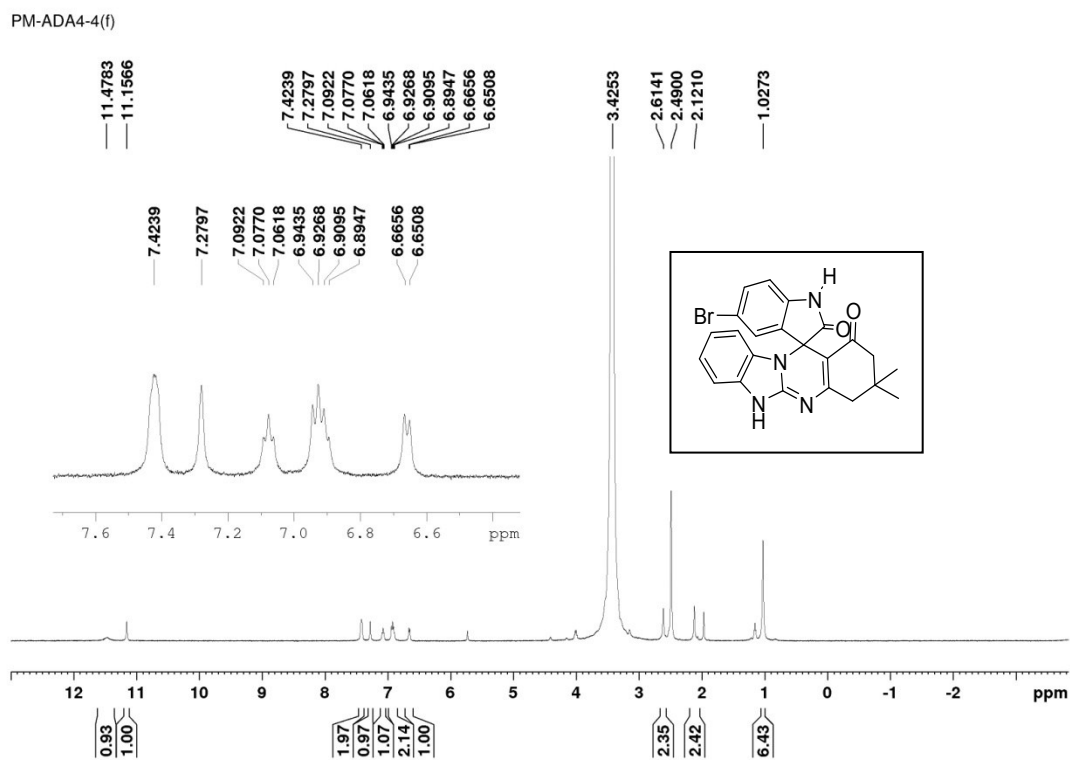

**<sup>1</sup>H NMR spectrum of compound 7c**

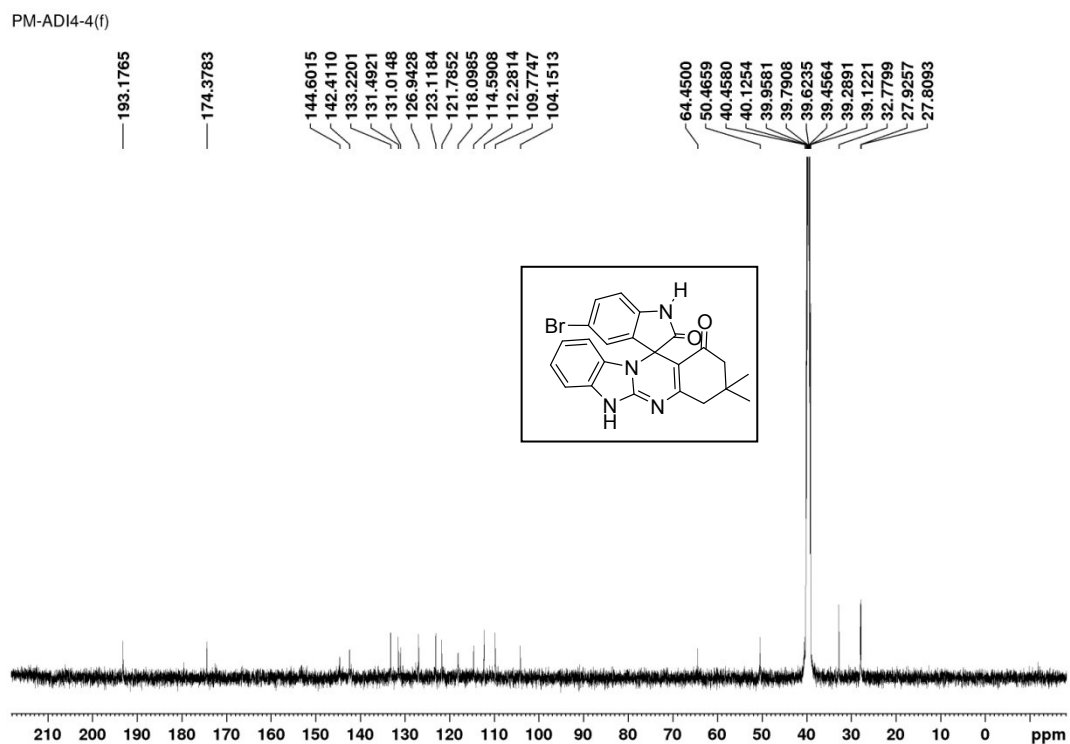

**<sup>13</sup>C NMR spectrum of compound 7c**

PM-AD14-4(f)

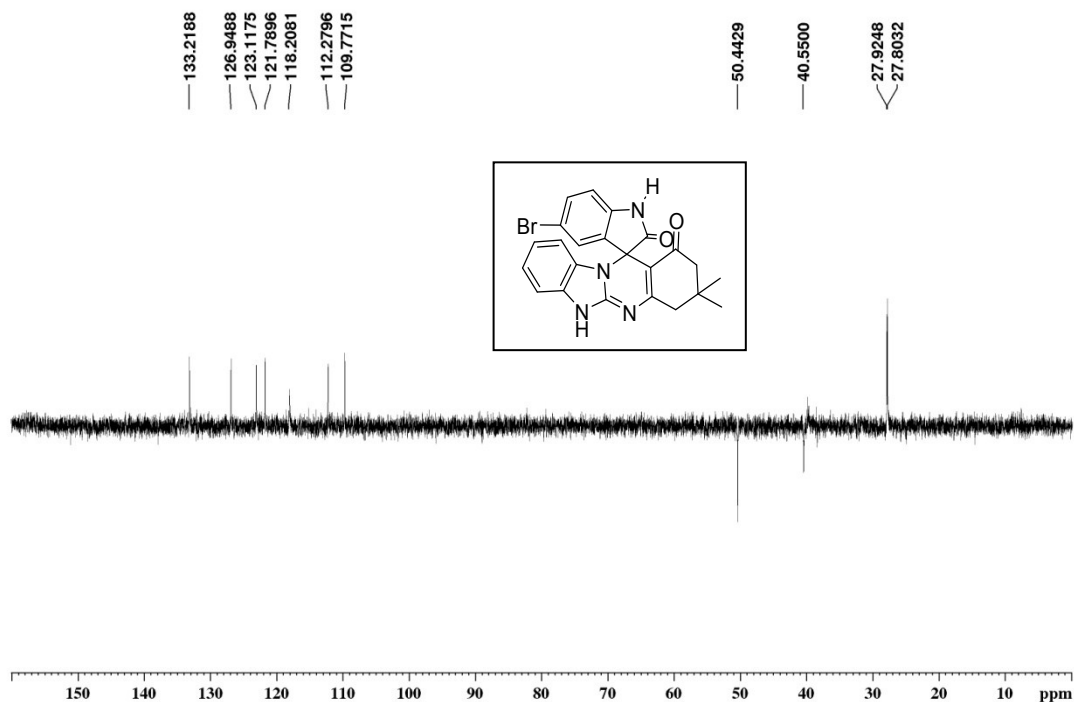

DEPT-135 NMR spectrum of compound 7c

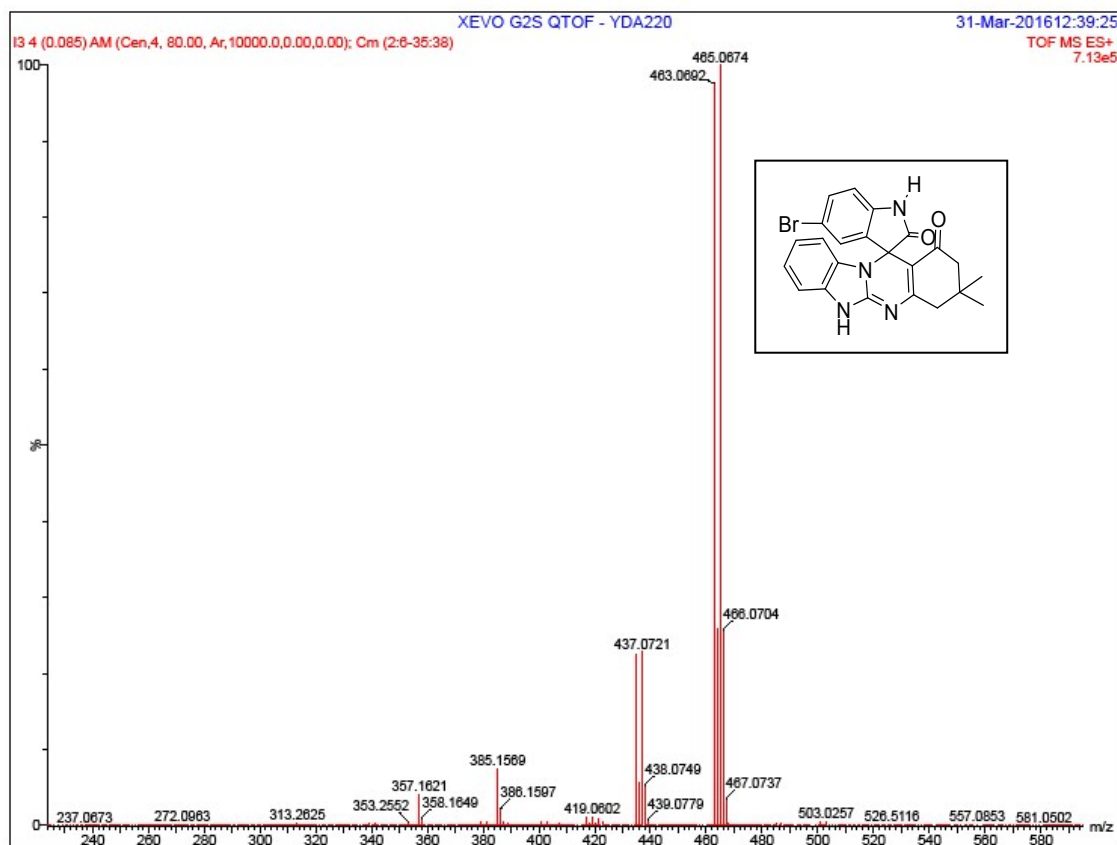

HRMS spectrum of compound 7c

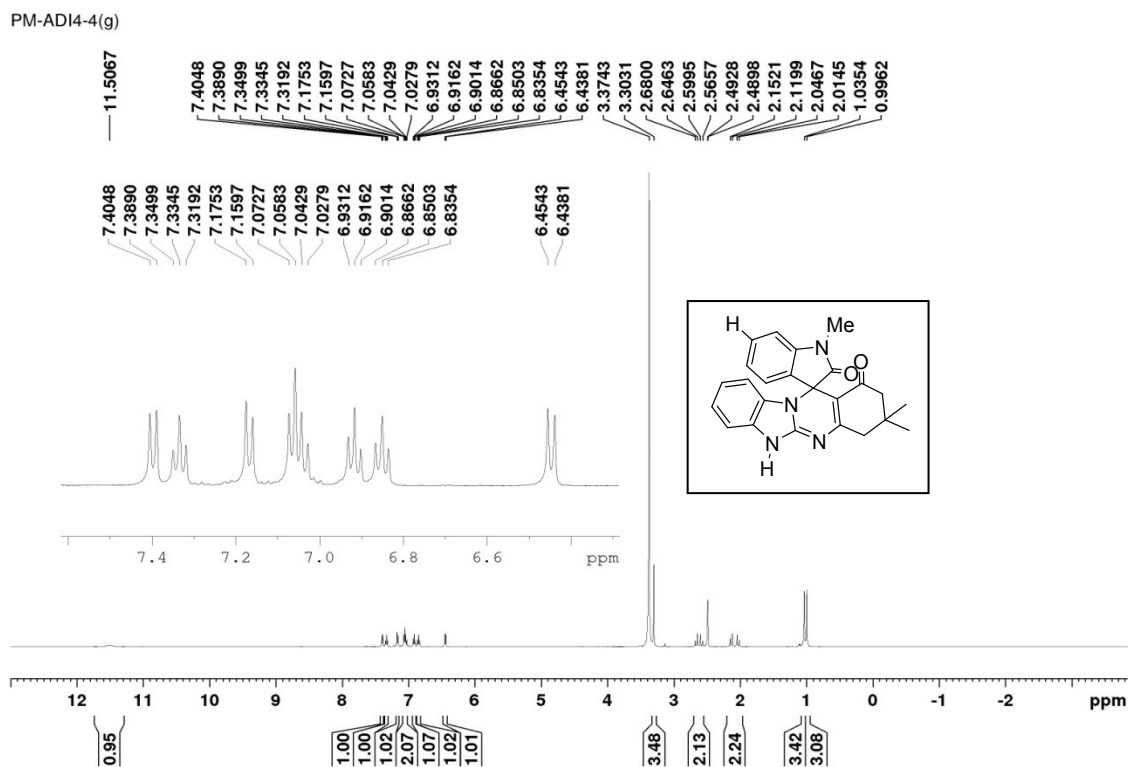

**<sup>1</sup>H NMR spectrum of compound 7d**

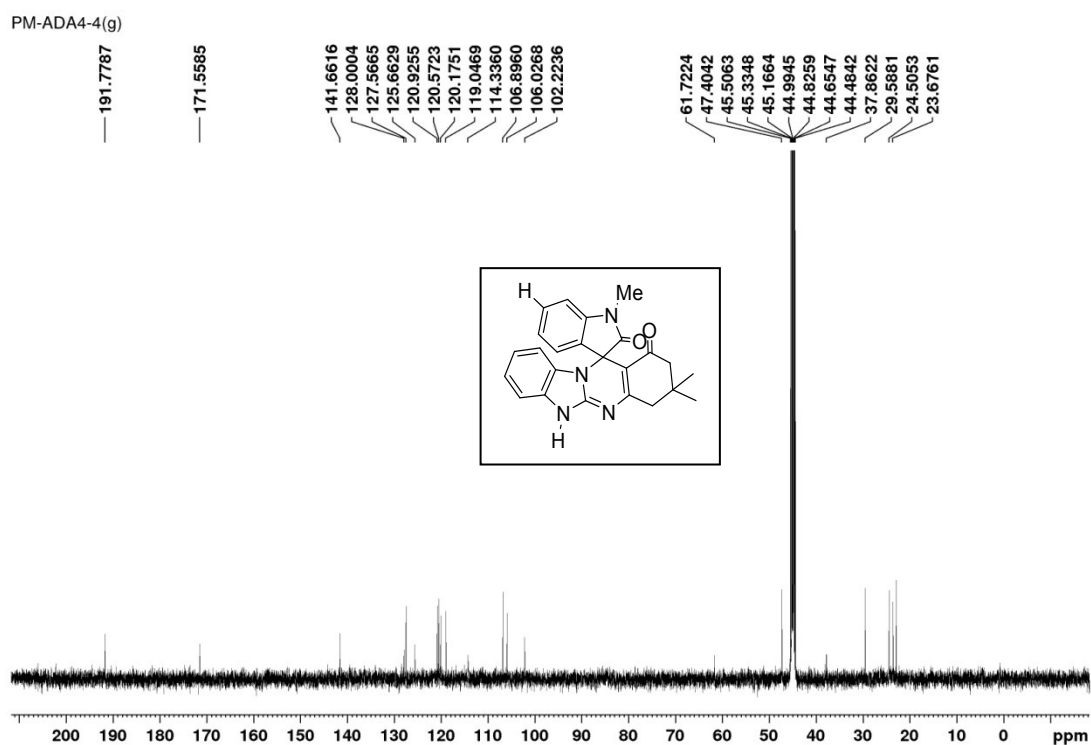

**<sup>13</sup>C NMR spectrum of compound 7d**

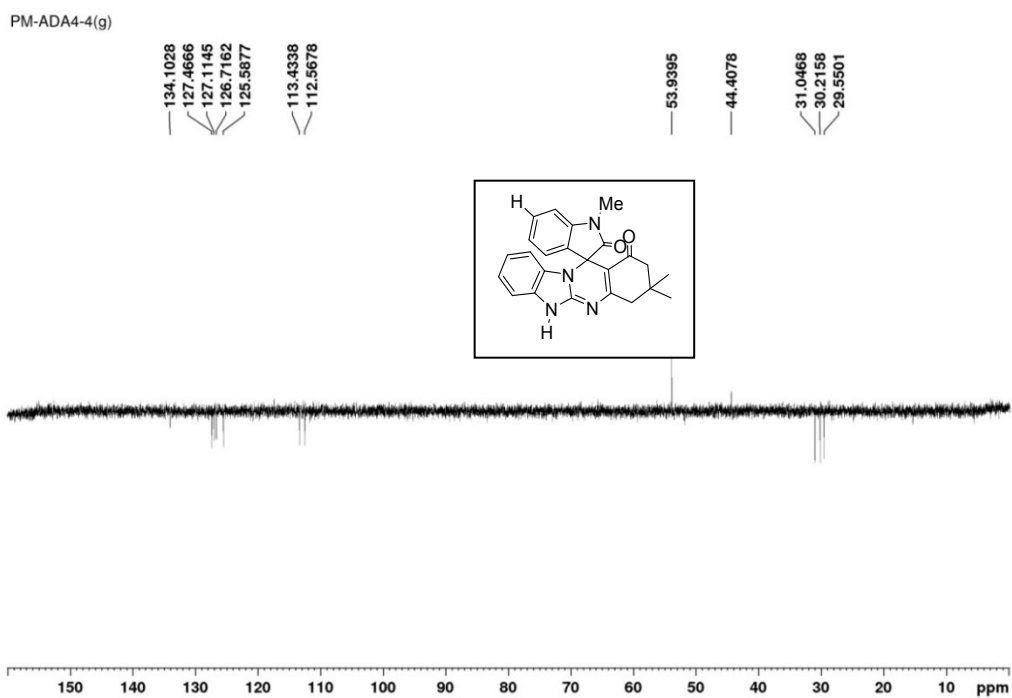

EPT-135 NMR spectrum of compound 7d

D

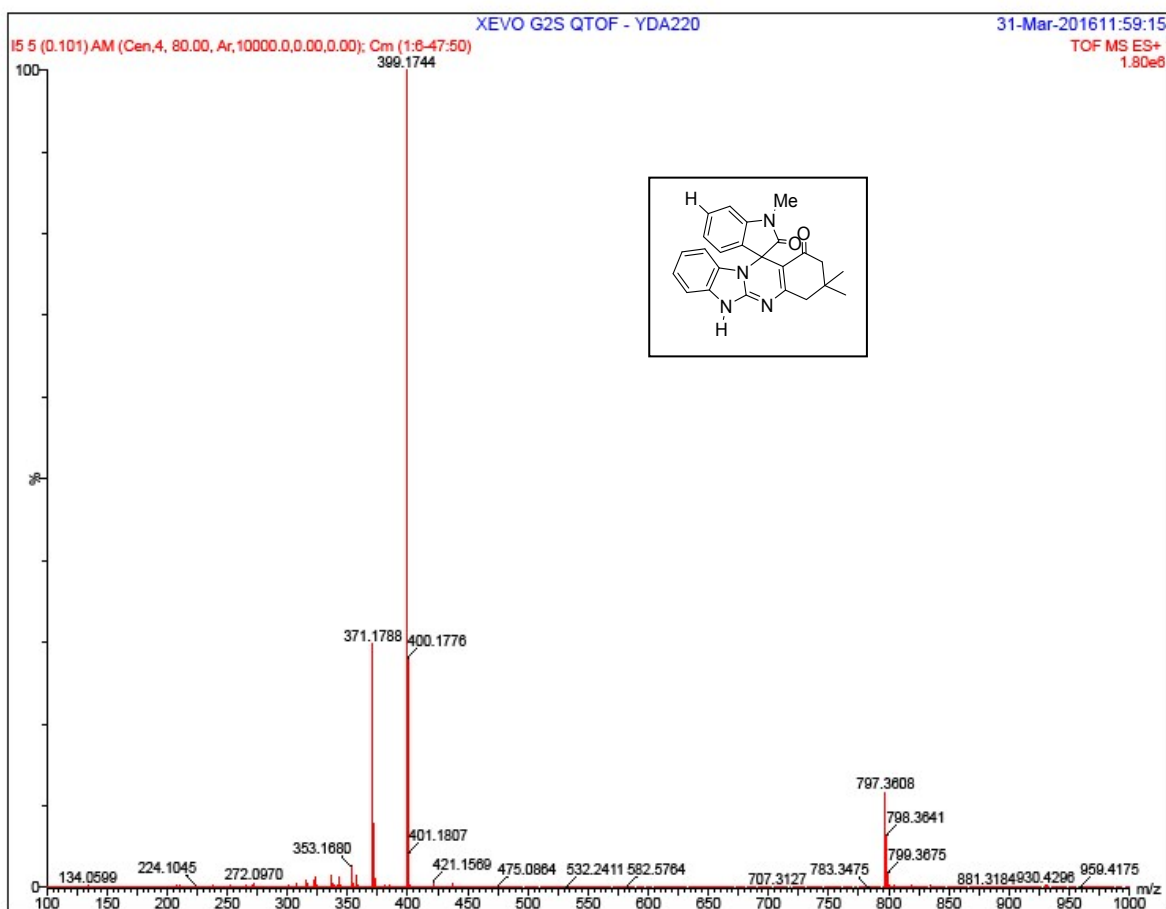

HRMS spectrum of compound 7d

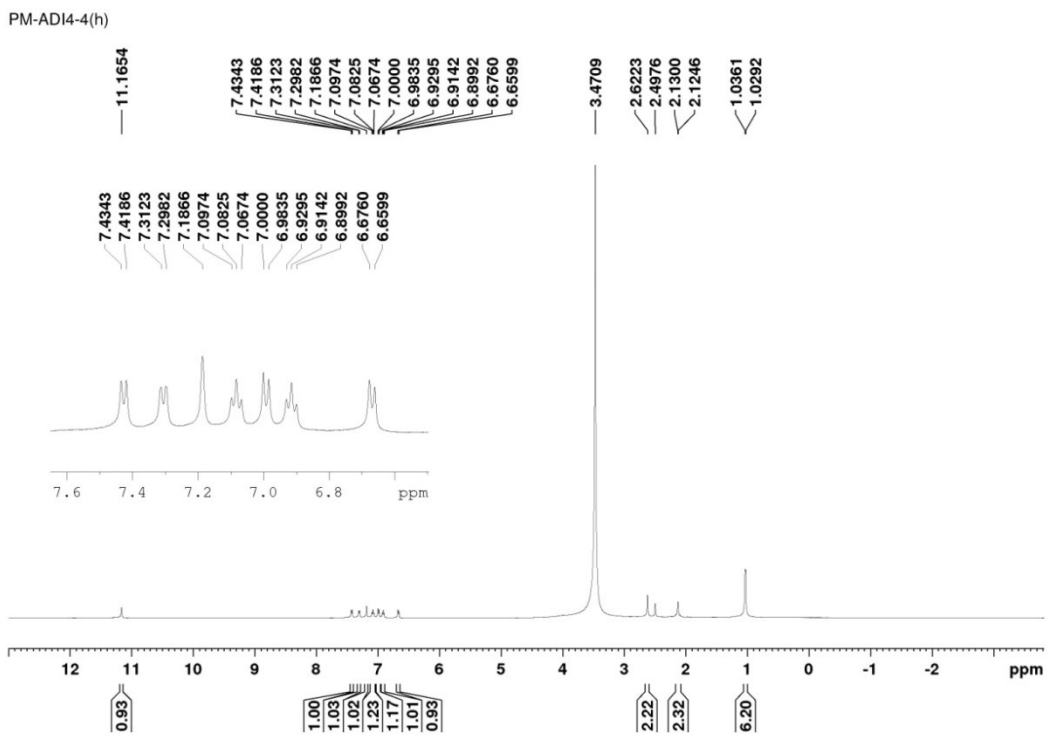

**<sup>1</sup>H NMR spectrum of compound 7e**

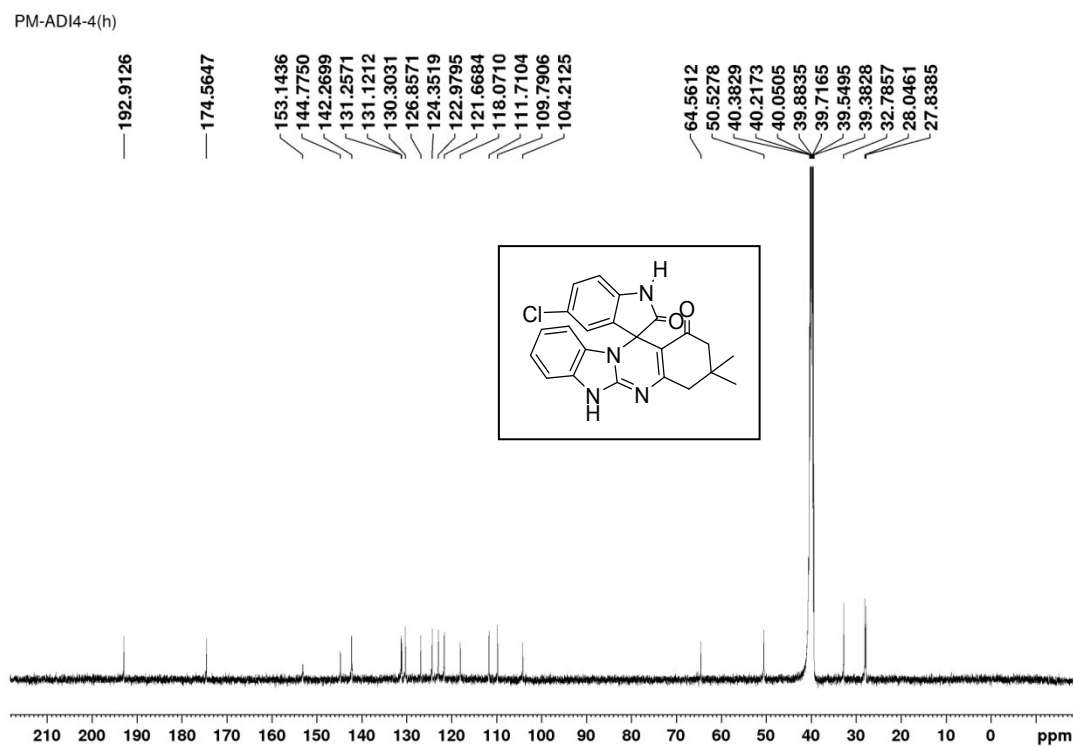

**<sup>13</sup>C NMR spectrum of compound 7e**

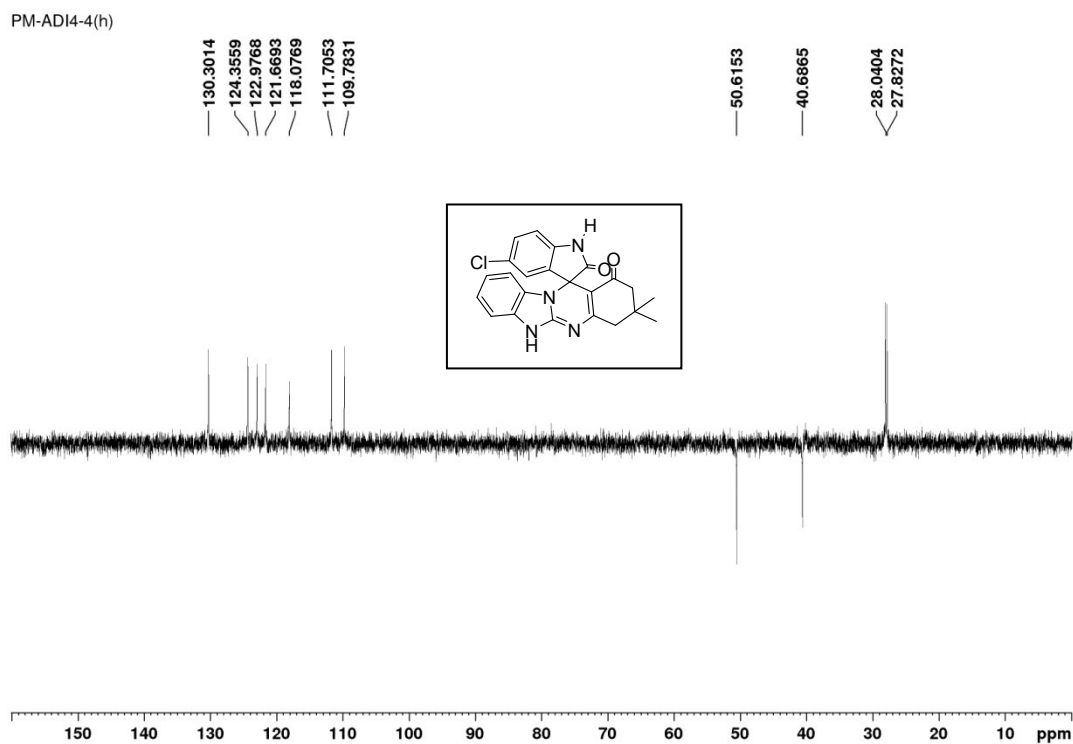

DEPT-135 NMR spectrum of compound 7e

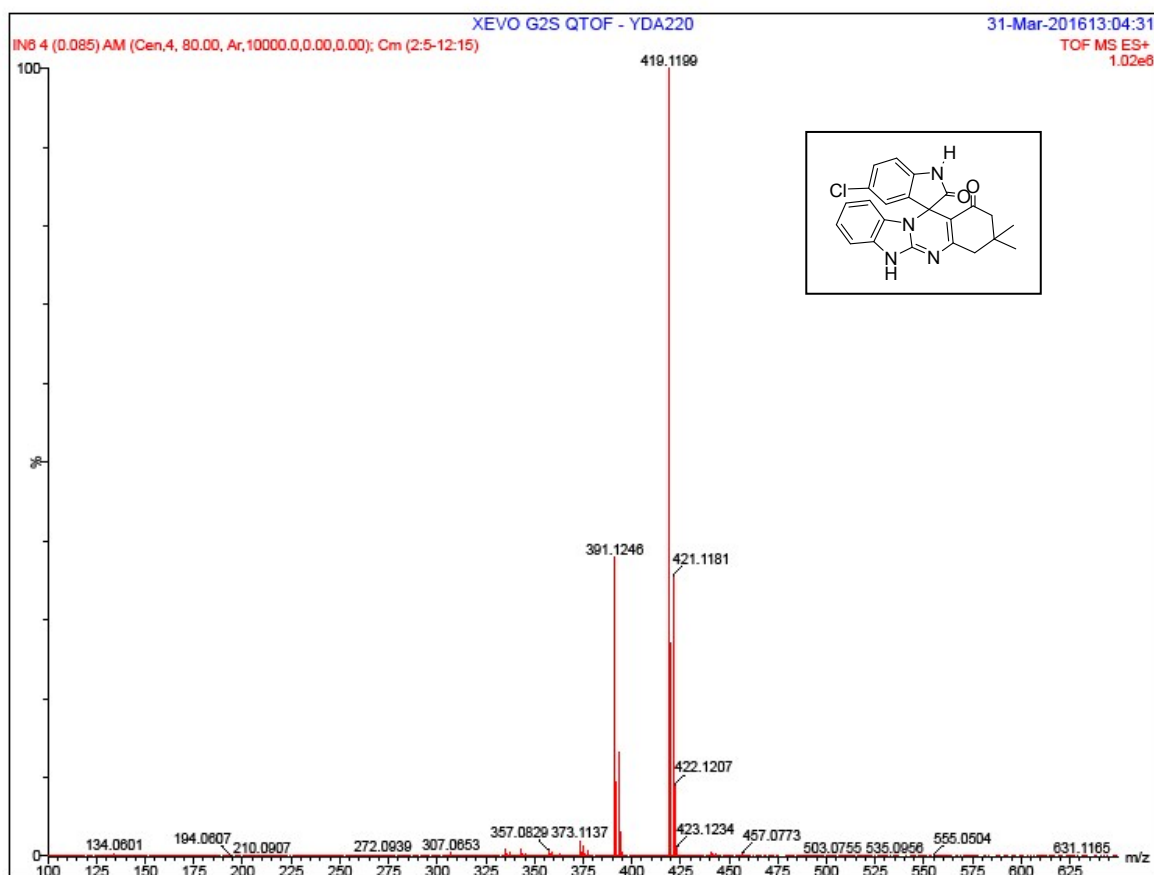

HRMS spectrum of compound 7e

PM-AD14-4(i)

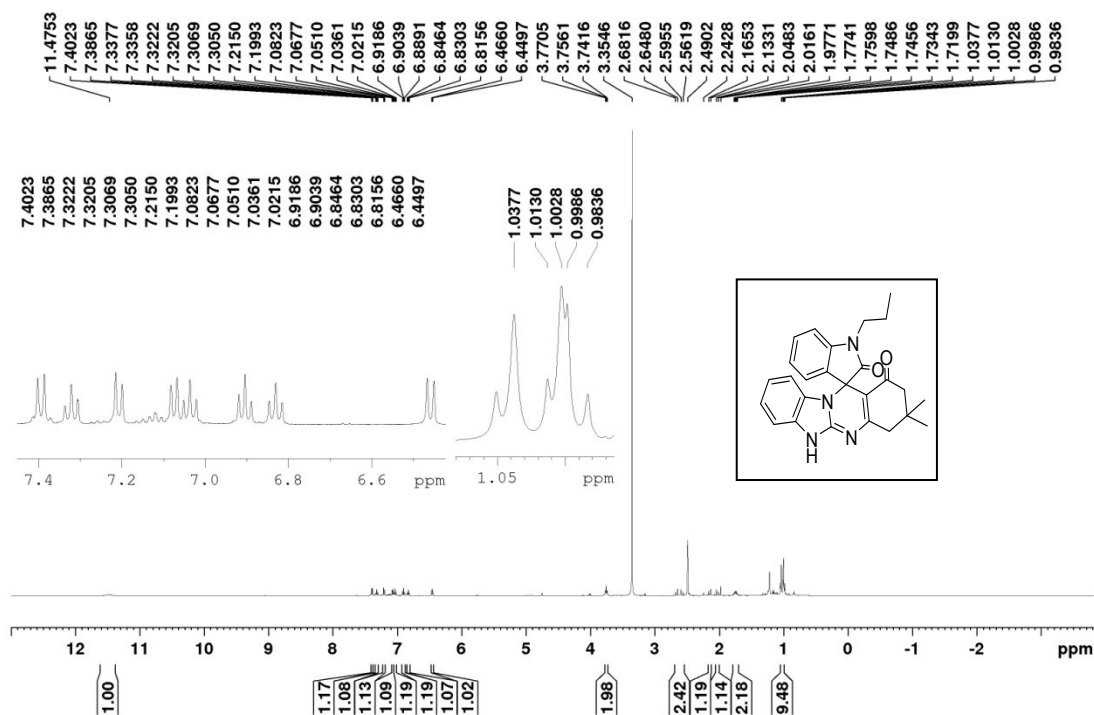

<sup>1</sup>H NMR spectrum of compound 7f

PM-AD14-4(i)

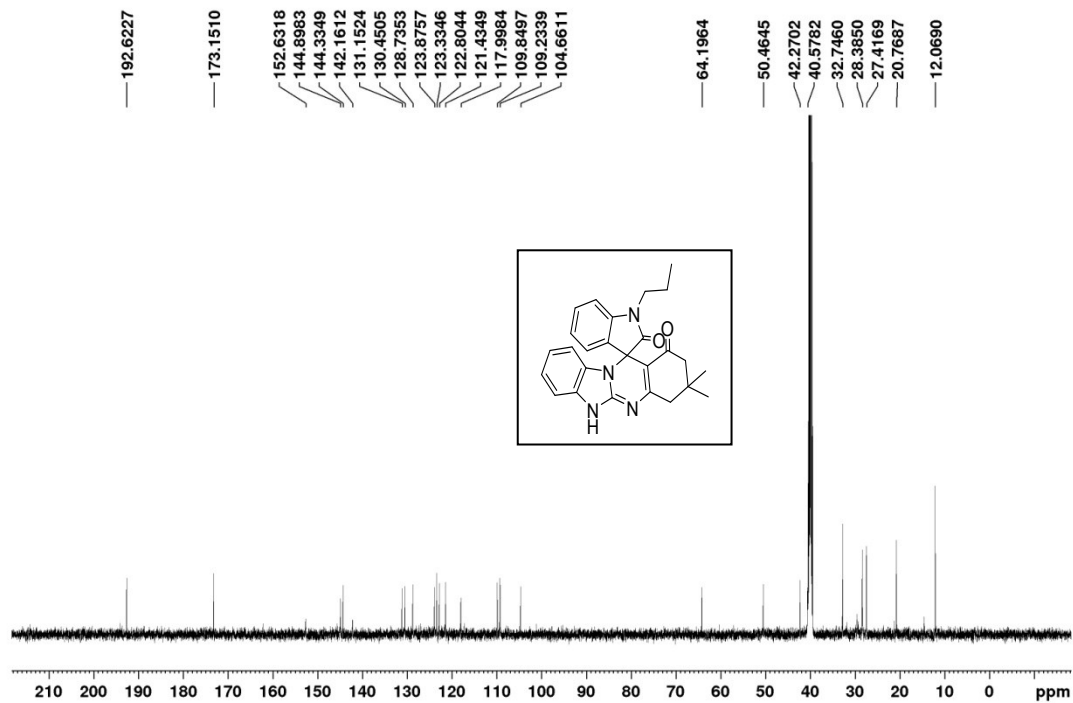

<sup>13</sup>C NMR spectrum of compound 7f

PM-AD14-4(i)

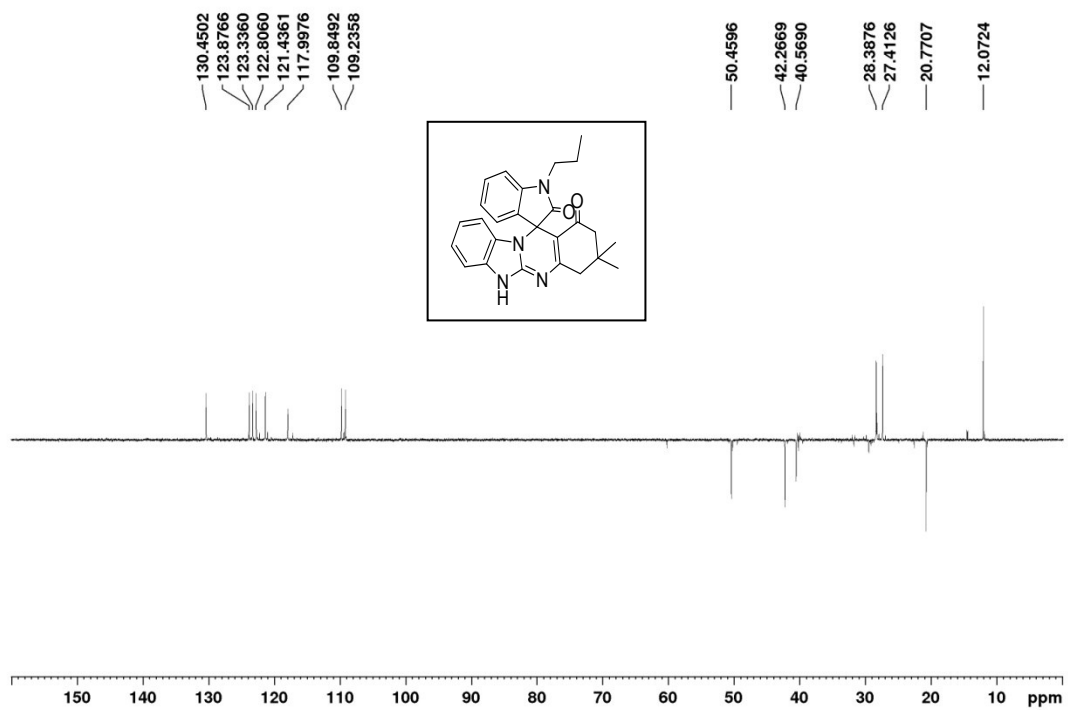

DEPT-135 NMR spectrum of compound 7f



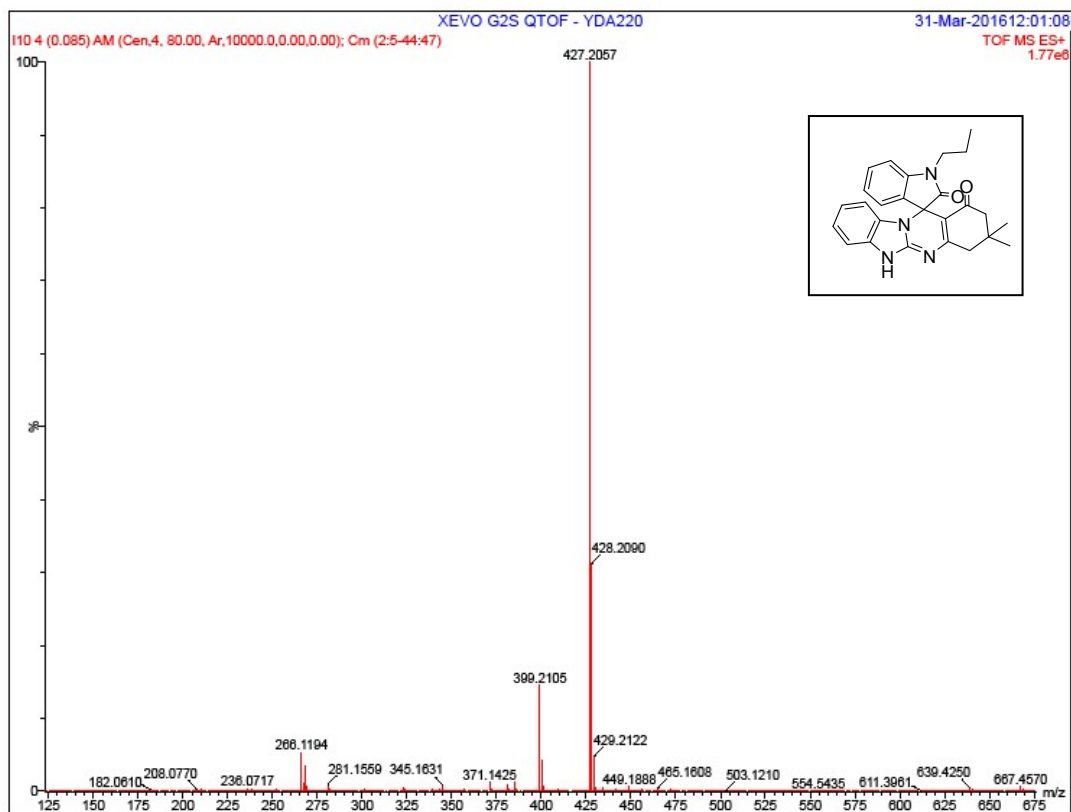

M

mass spectrum of compound 7f

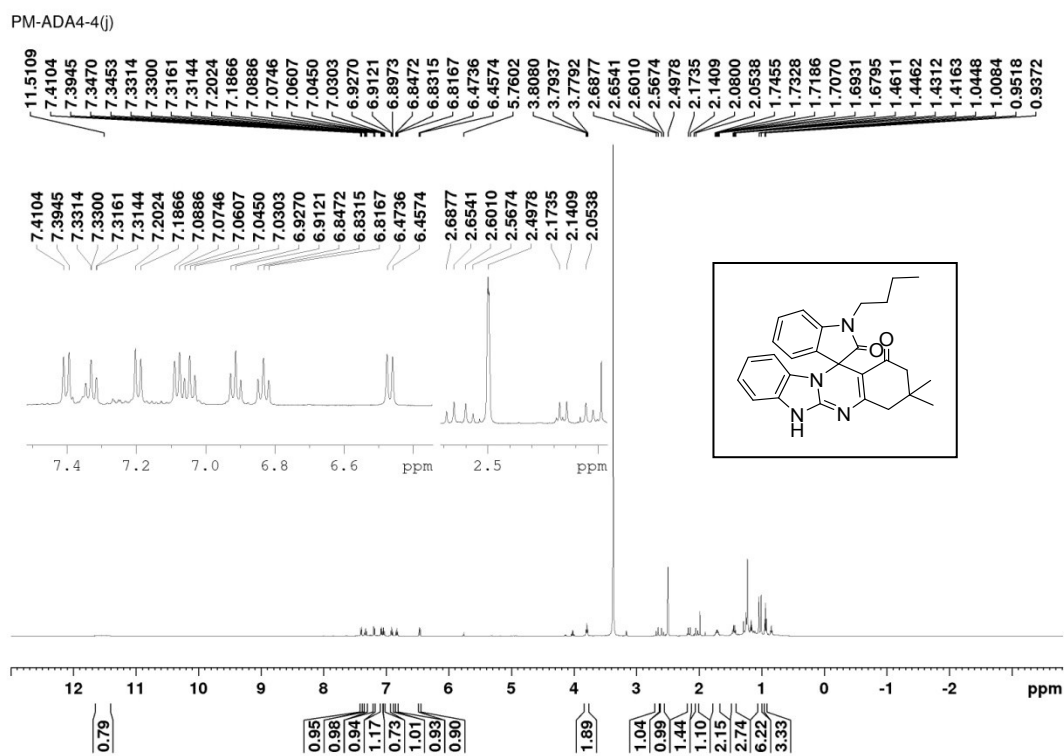

<sup>1</sup>H NMR spectrum of compound 7g

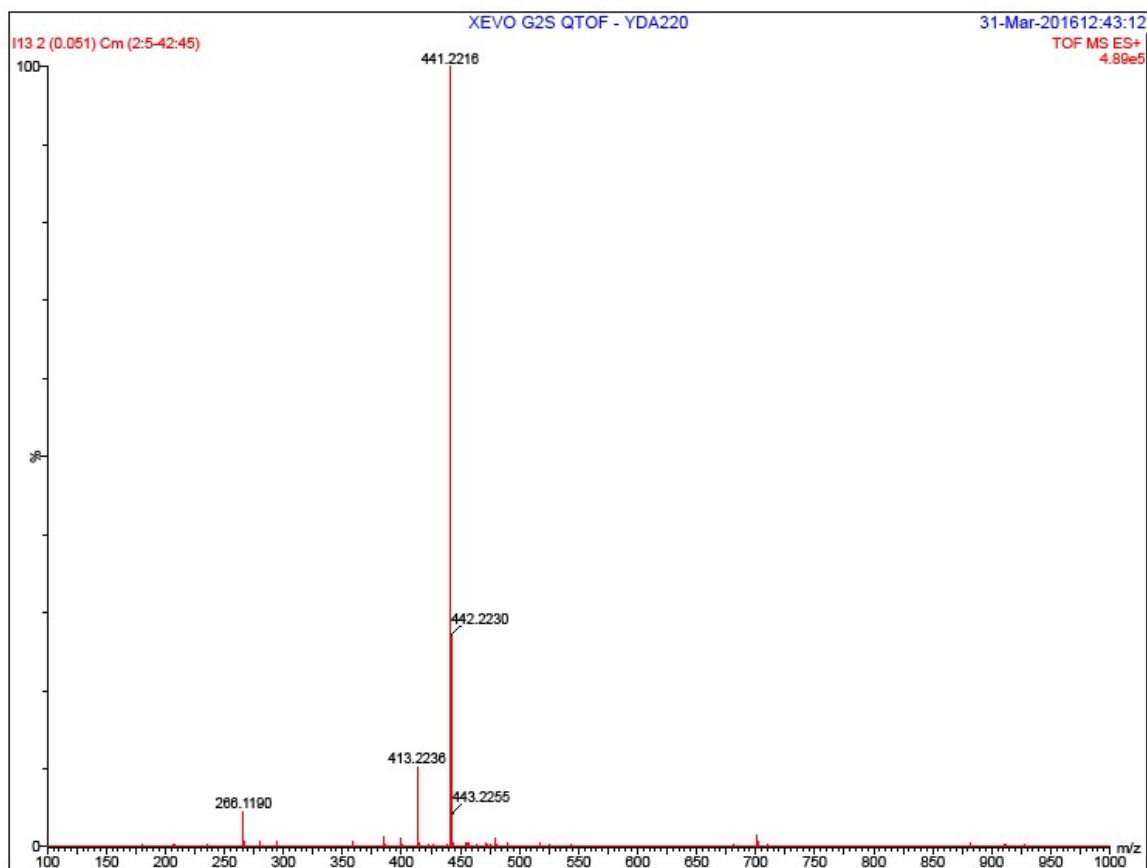

HRMS spectrum of compound 7g

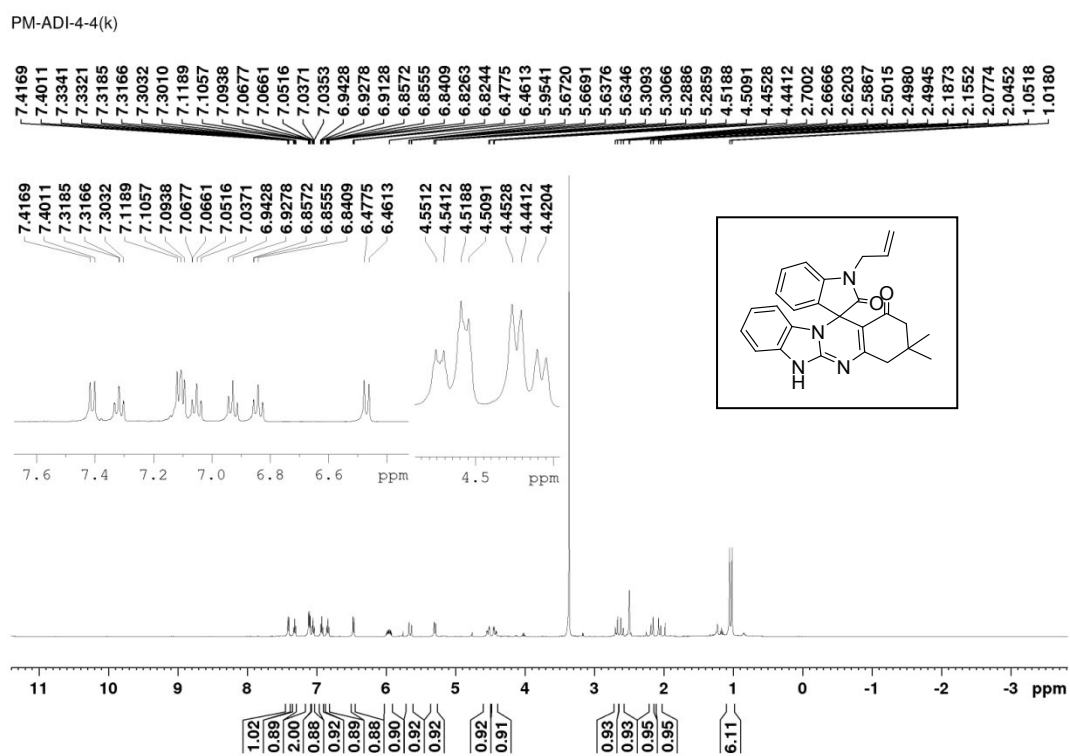

<sup>1</sup>H NMR spectrum of compound 7h

PM-ADA-4-4(k)

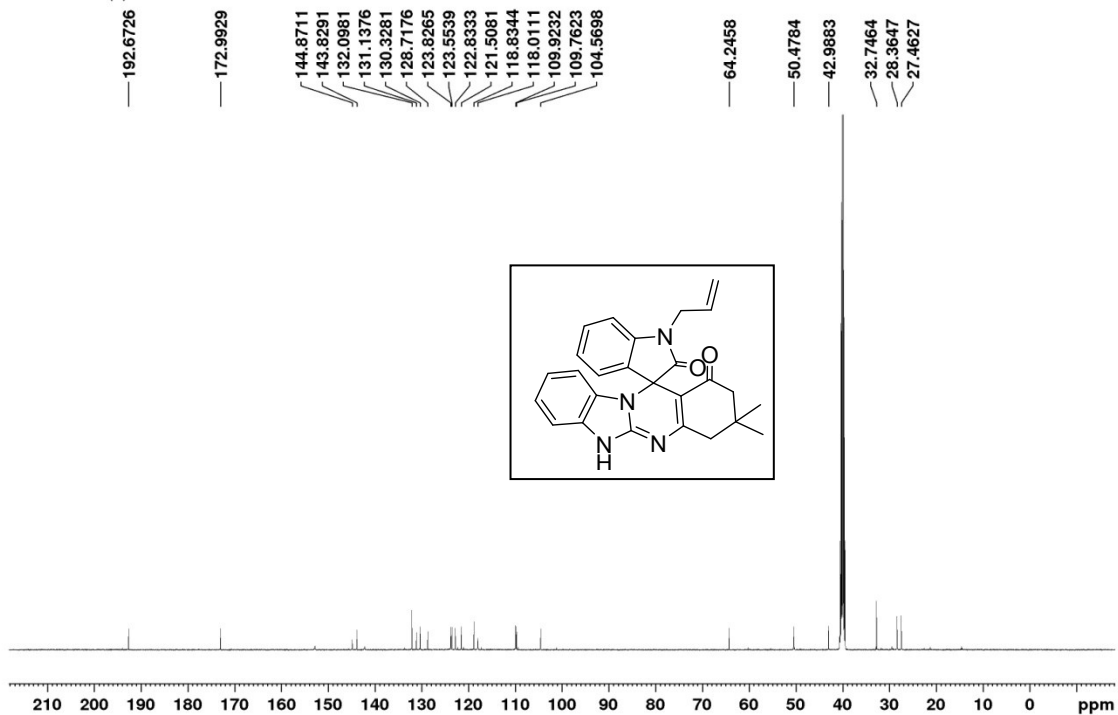

**<sup>13</sup>C NMR spectrum of compound 7h**

PM-ADA-4-4(k)

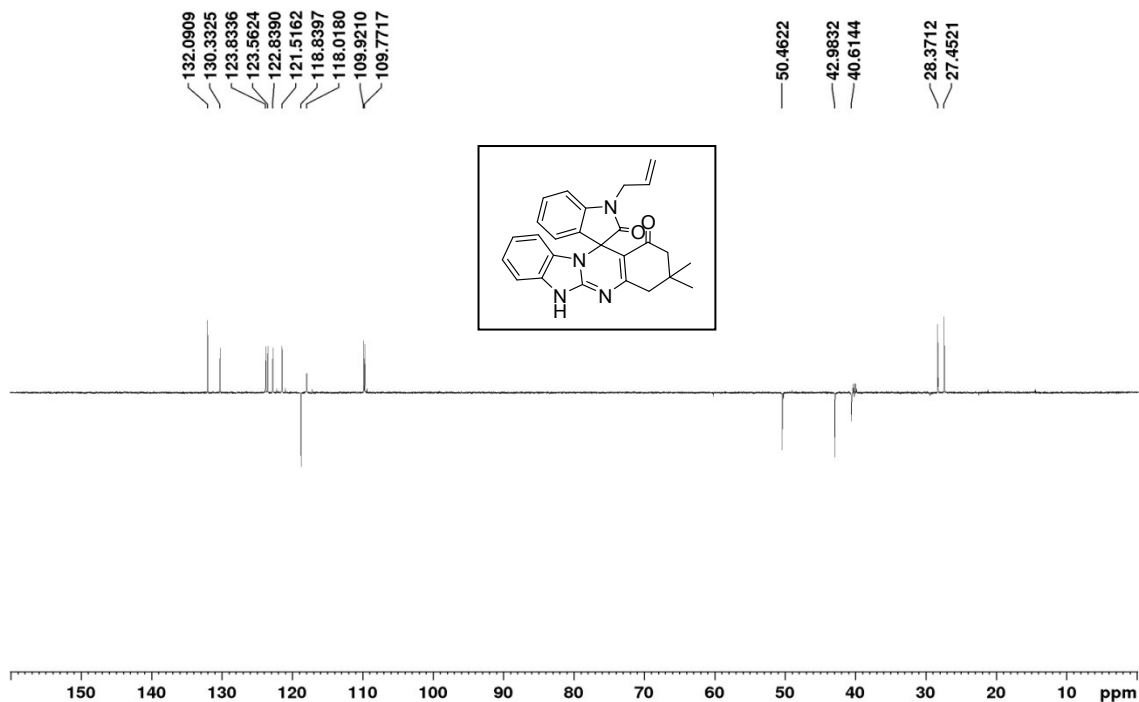

**DEPT-135 NMR spectrum of compound 7h**

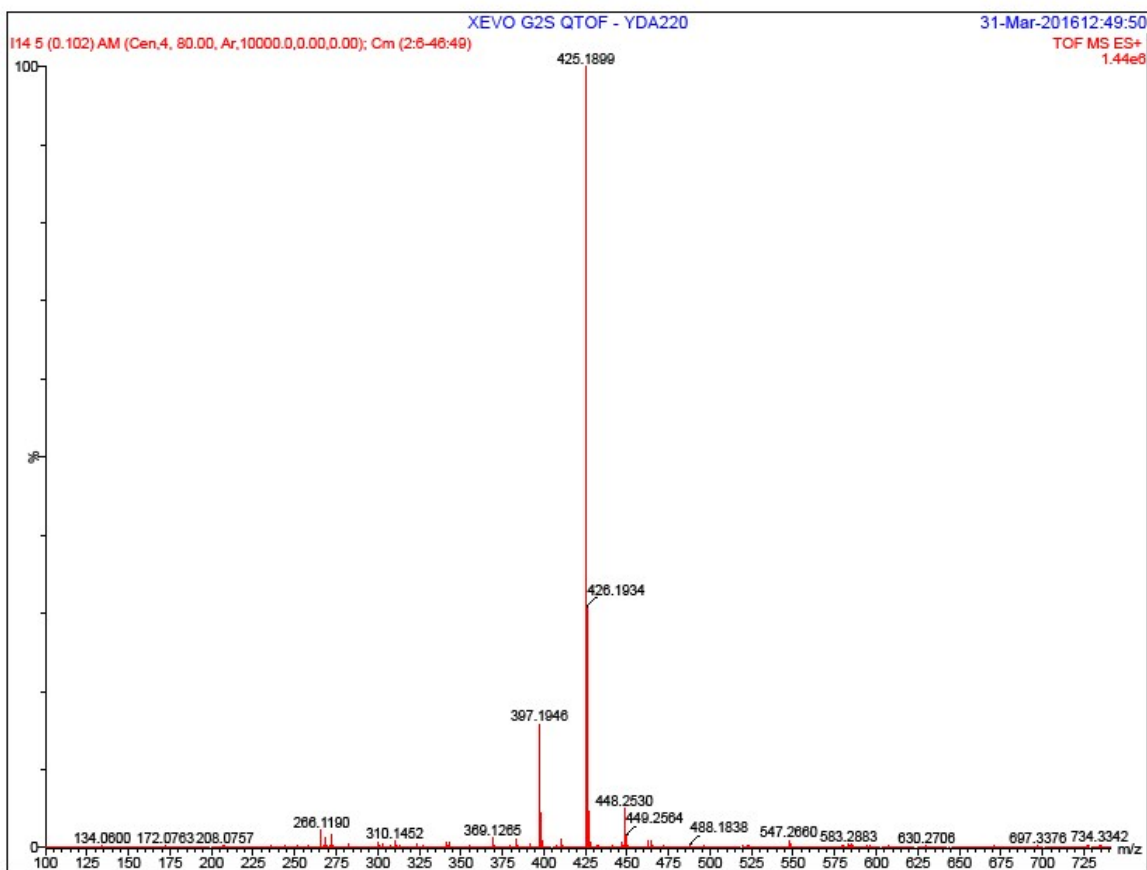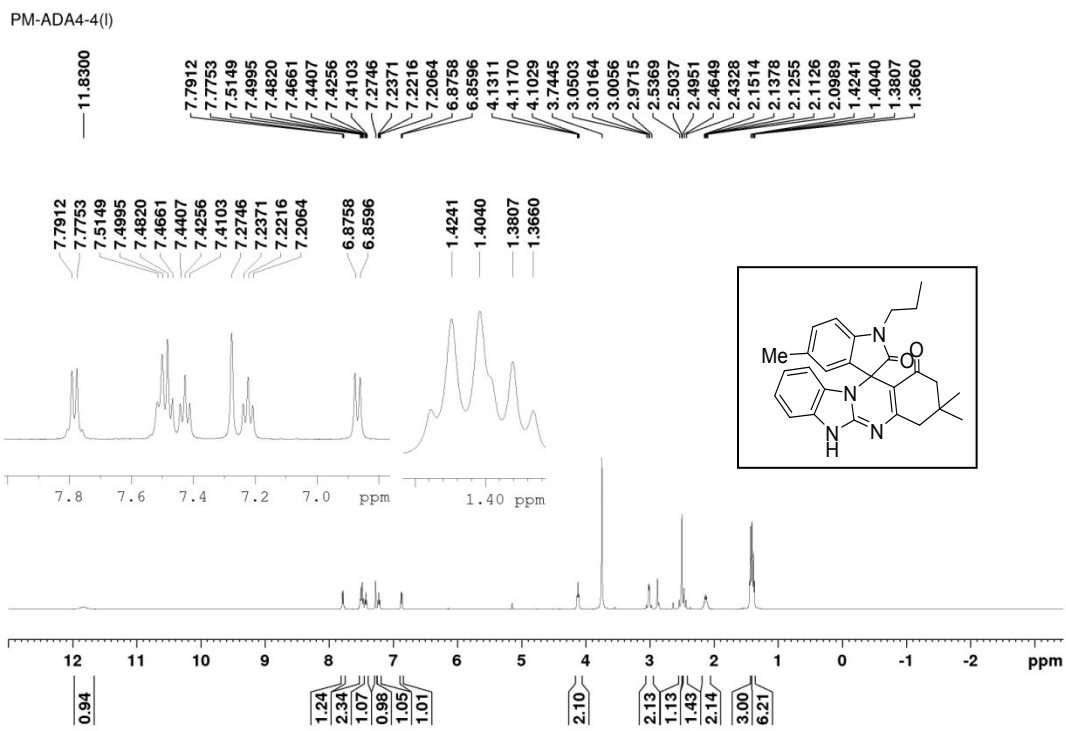

<sup>1</sup>H NMR spectrum of compound 7i

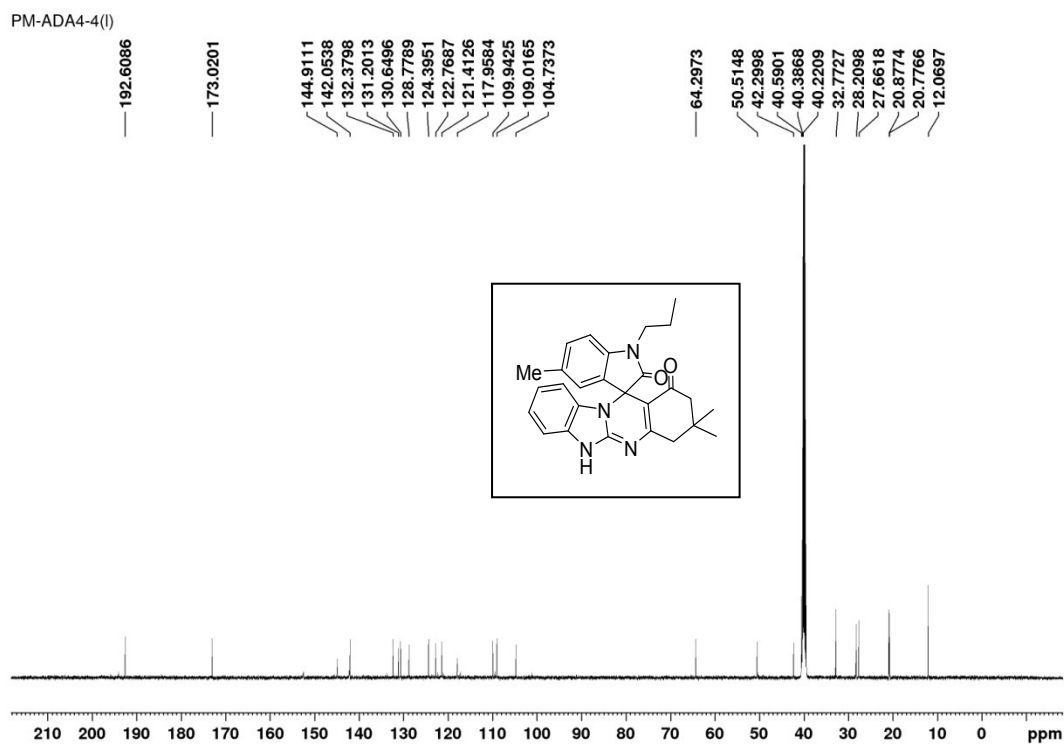

**<sup>13</sup>C NMR spectrum of compound 7i**

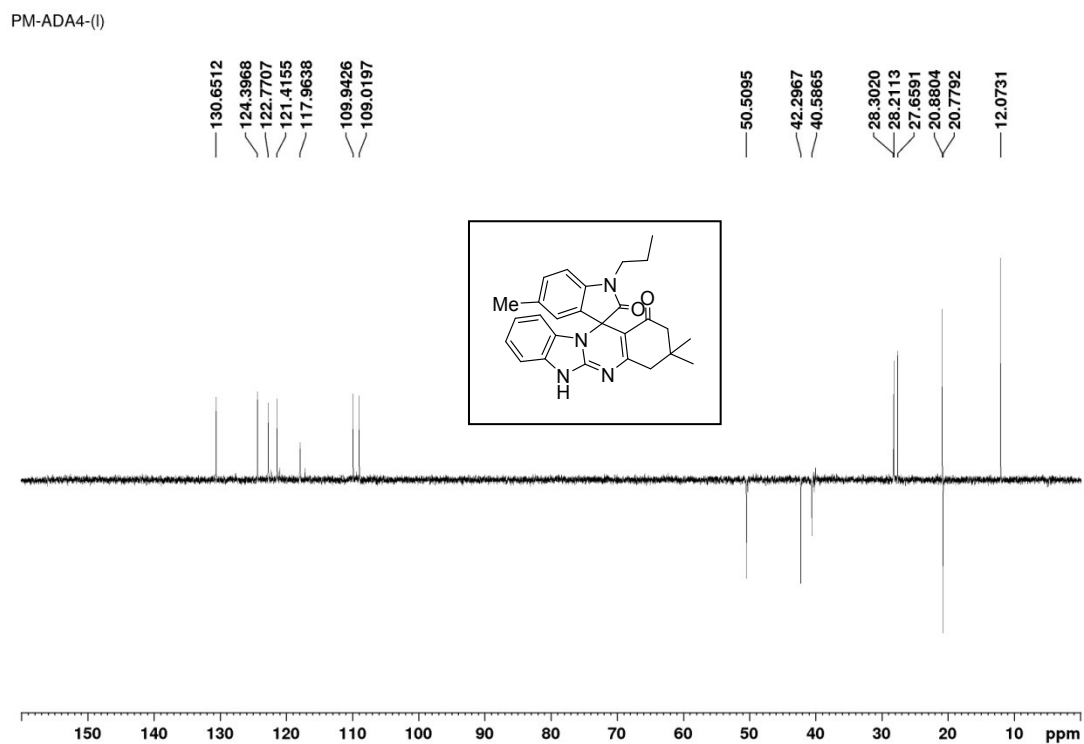

**DEPT-135 NMR spectrum of compound 7i**

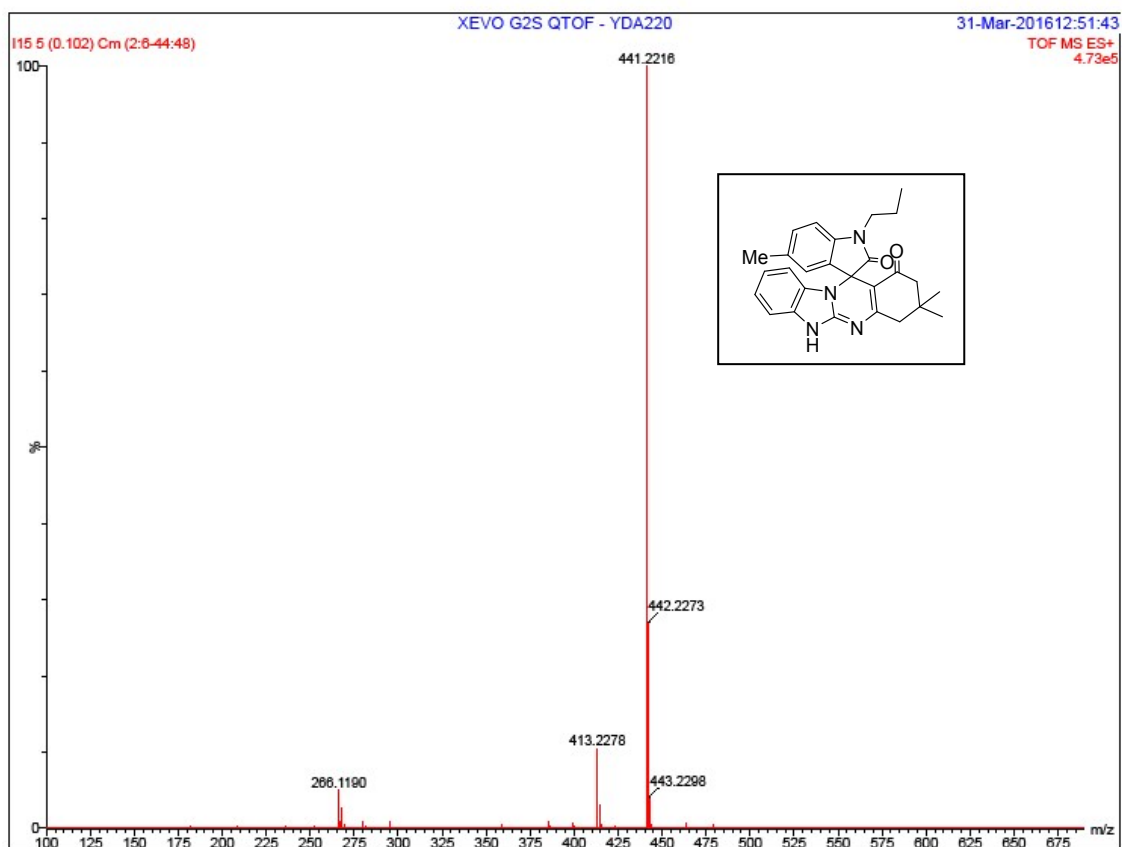

HRMS spectrum of compound 7i

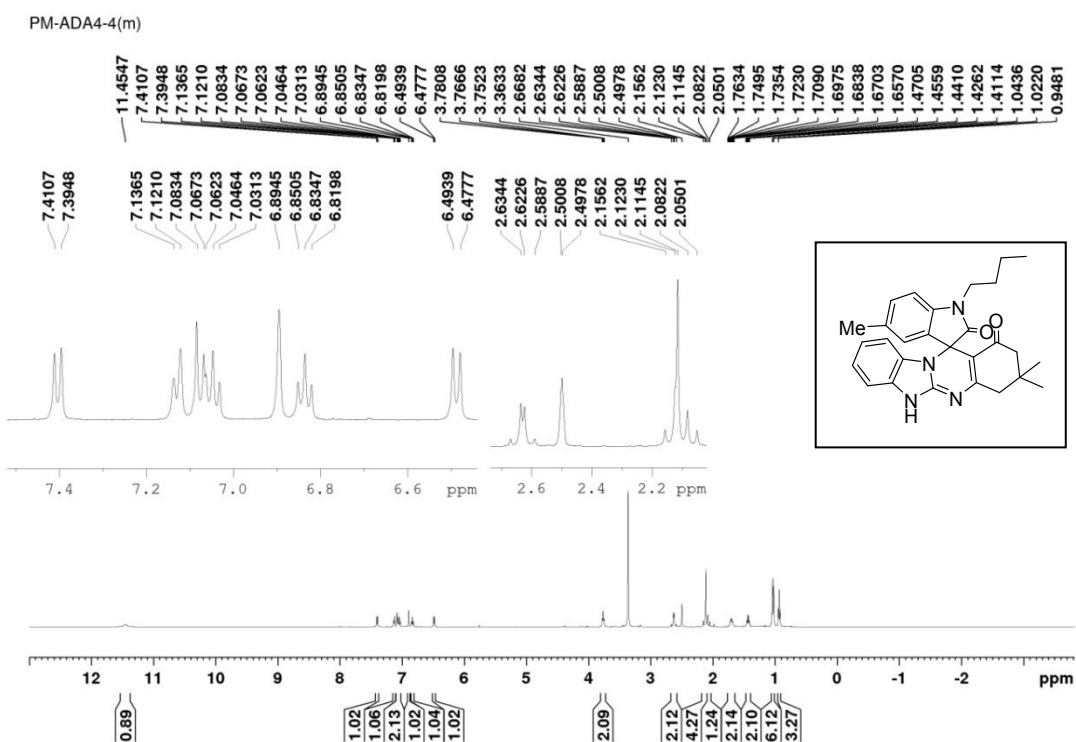

<sup>1</sup>H NMR spectrum of compound 7j

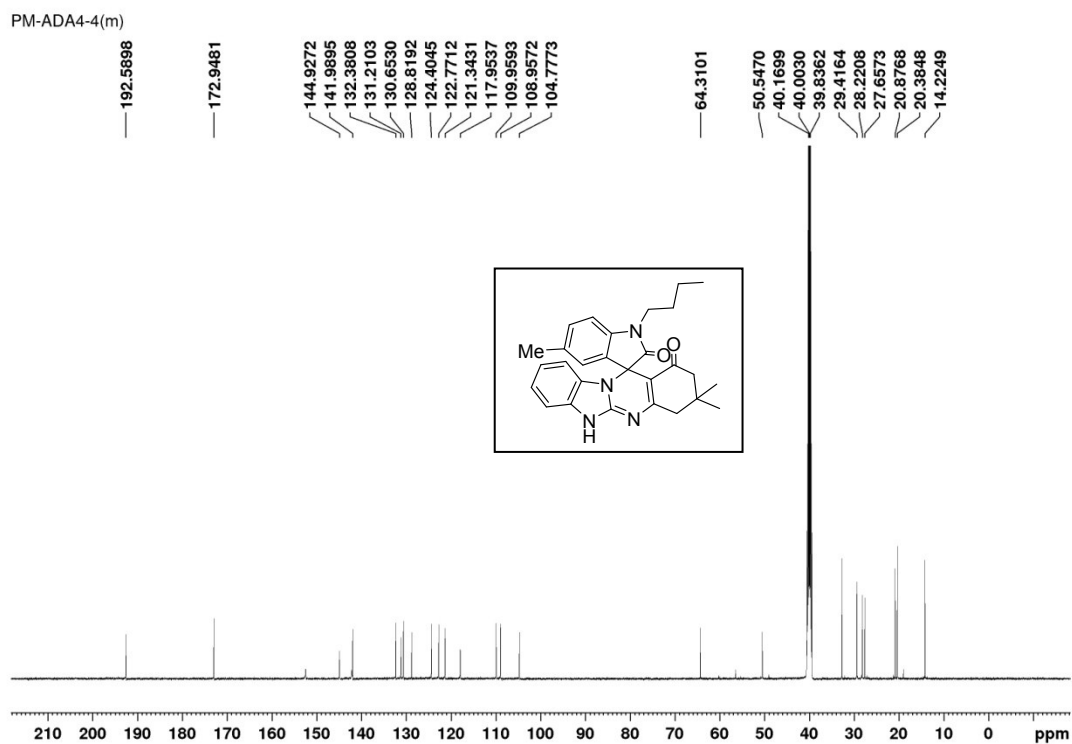

**<sup>13</sup>C NMR spectrum of compound 7j**

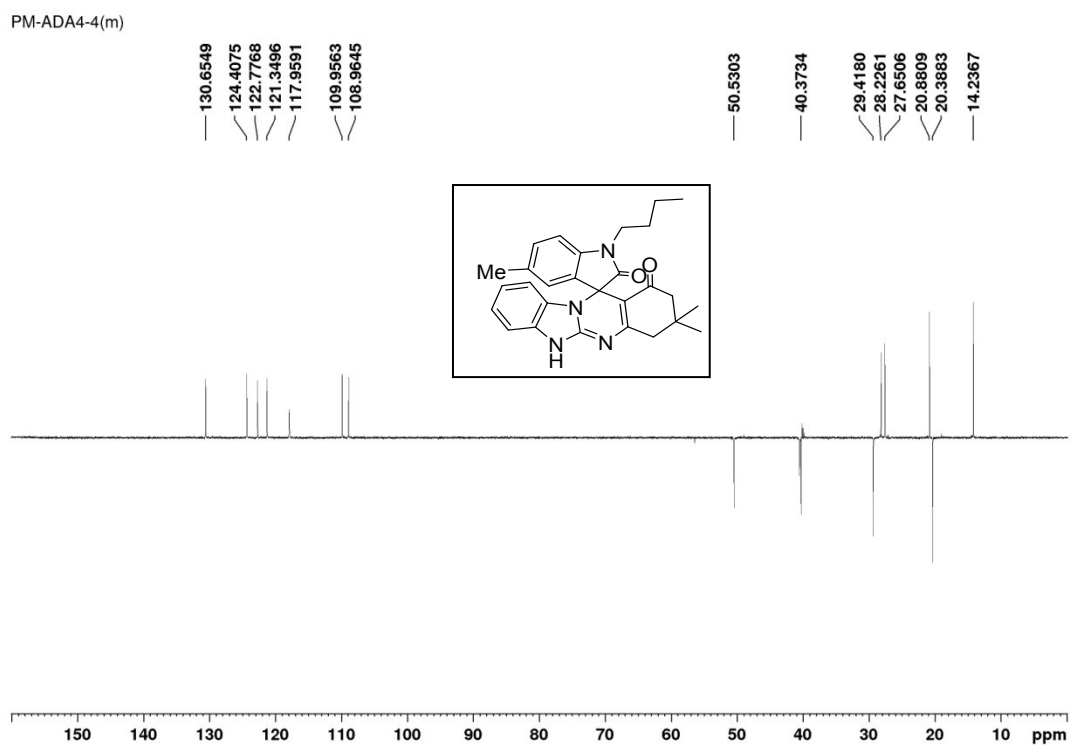

**DEPT-135 NMR spectrum of compound 7j**

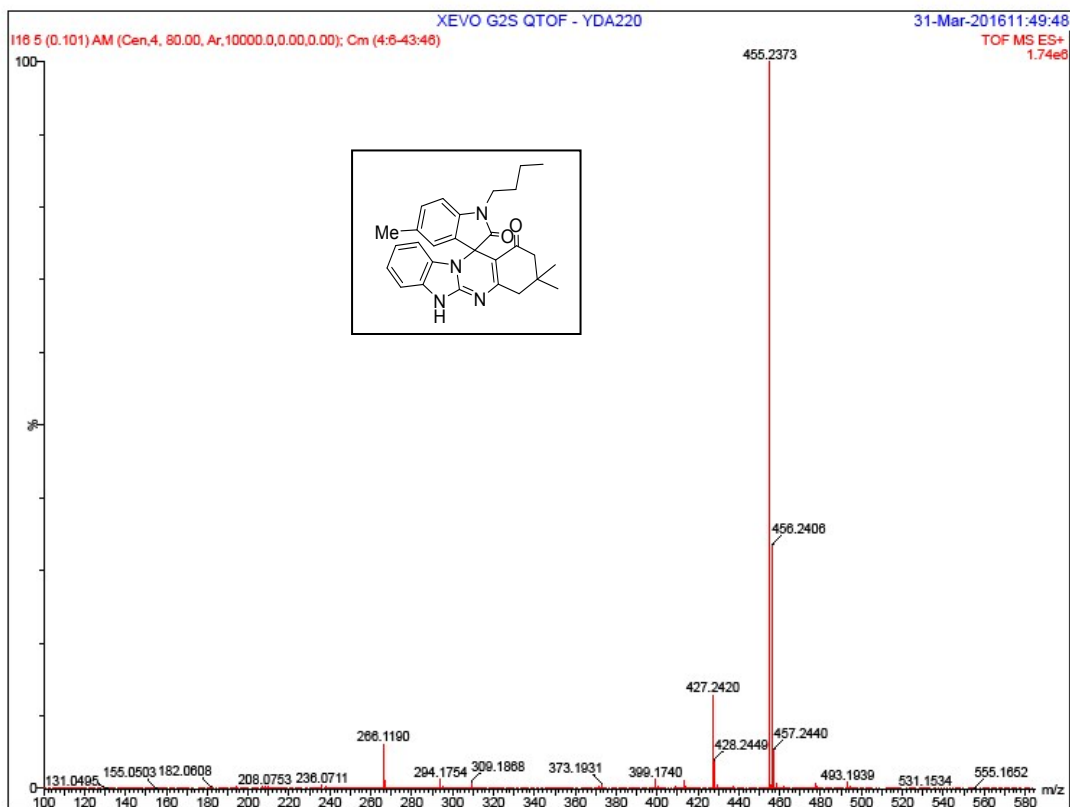

H

PM\_ADA\_4-4(n)

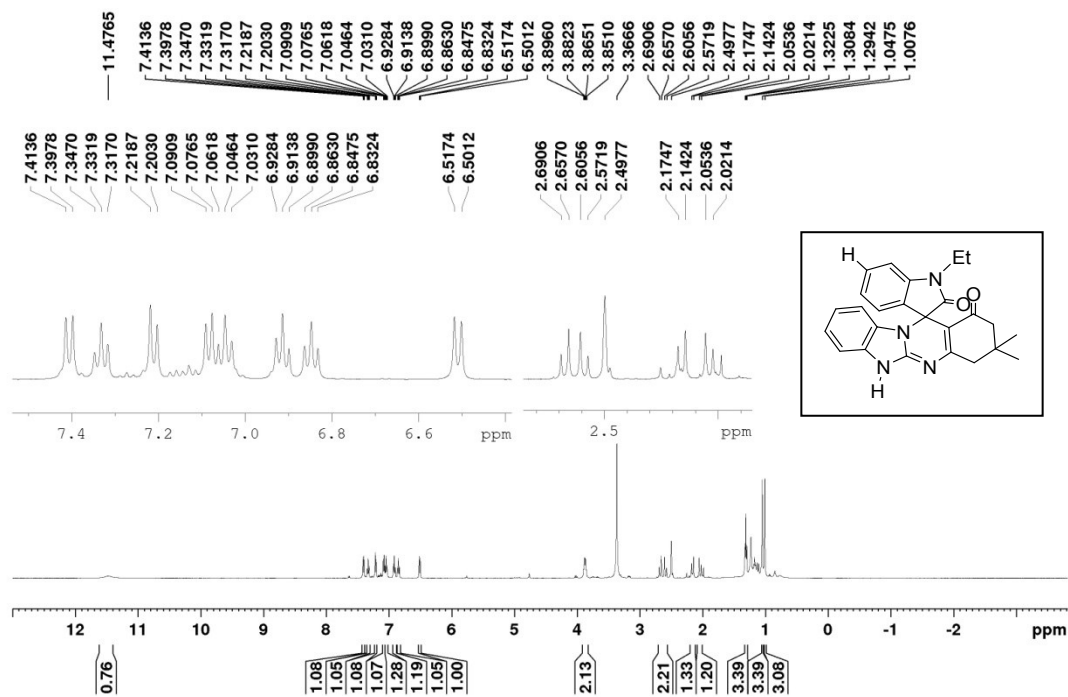



PM\_ADA-4(n)

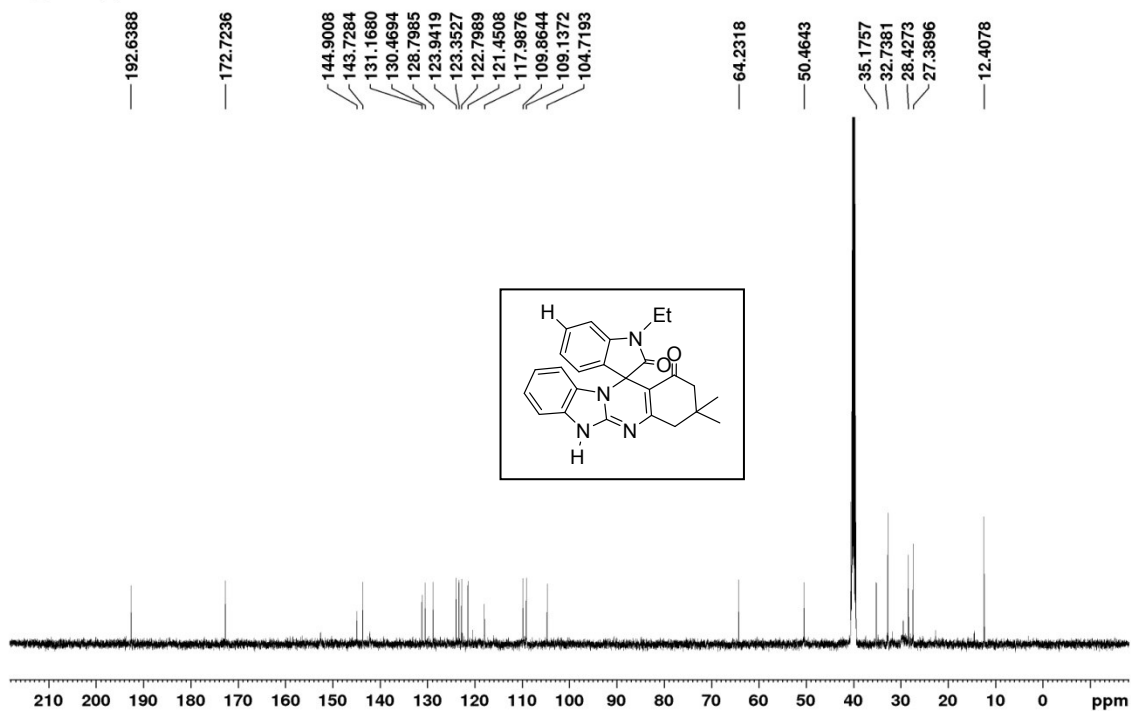

**<sup>13</sup>C NMR spectrum of compound 7k**

PM\_ADA-4-4(n)

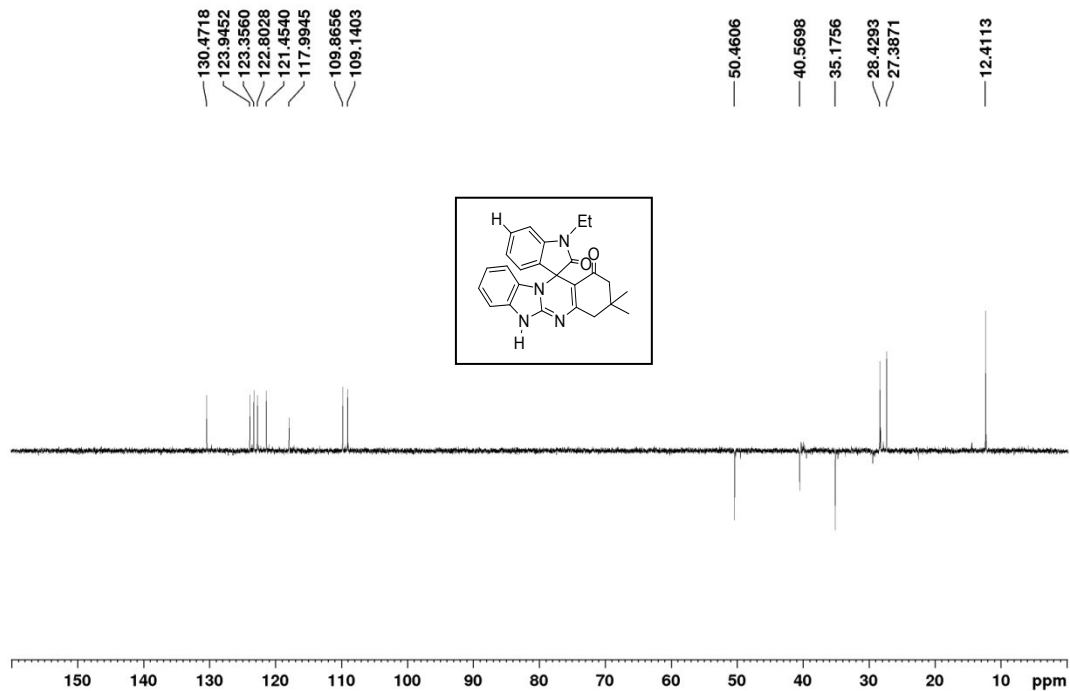

**DEPT-135 NMR spectrum of compound 7k**

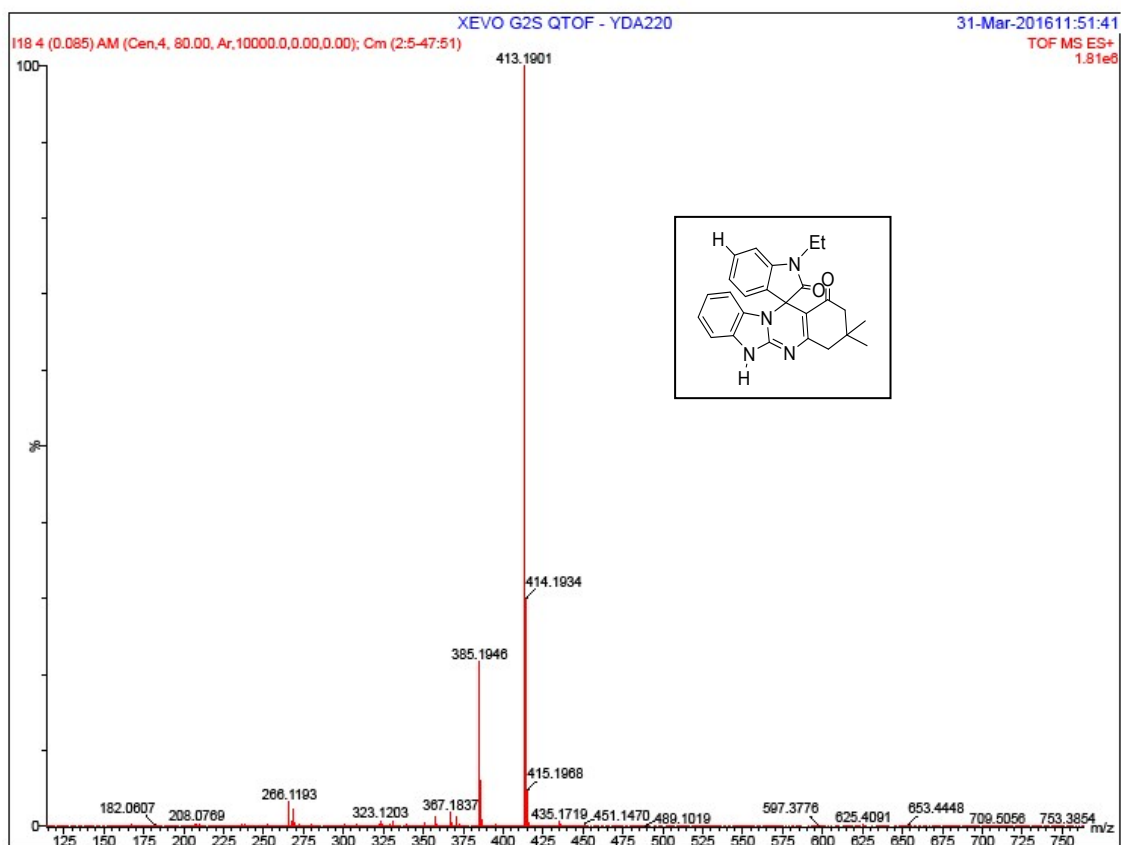

HRMS spectrum of compound 7k

PM-ADI-4-I-19  
 19/3/16

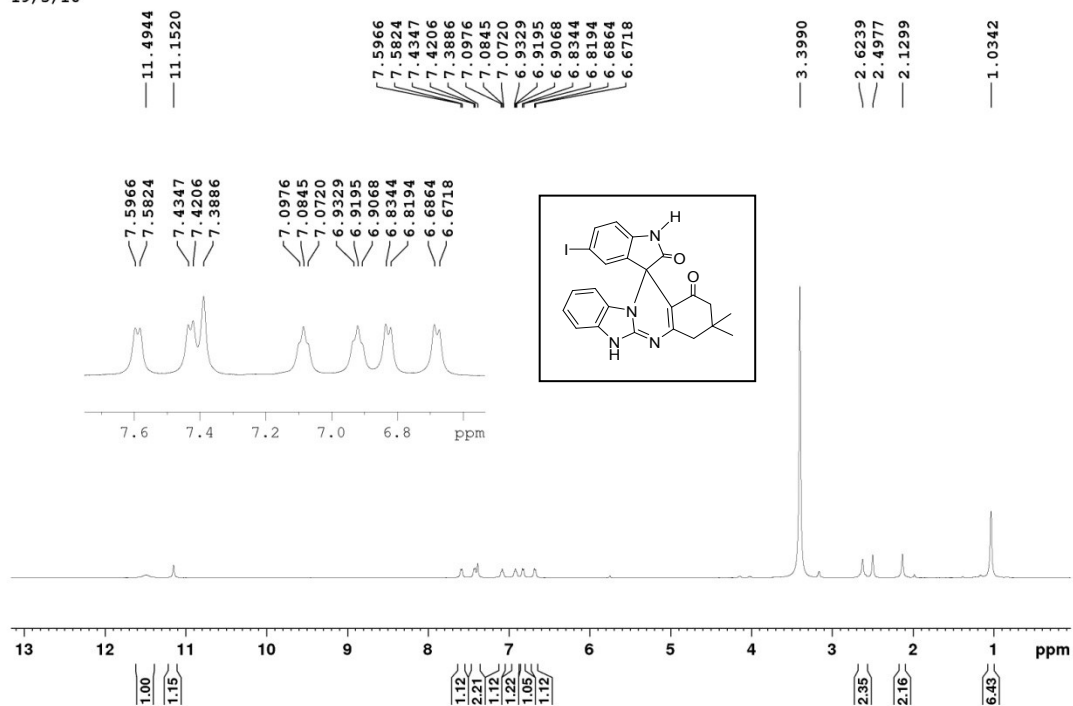

<sup>1</sup>H NMR spectrum of compound 7l

PM-ADI-4-I-19

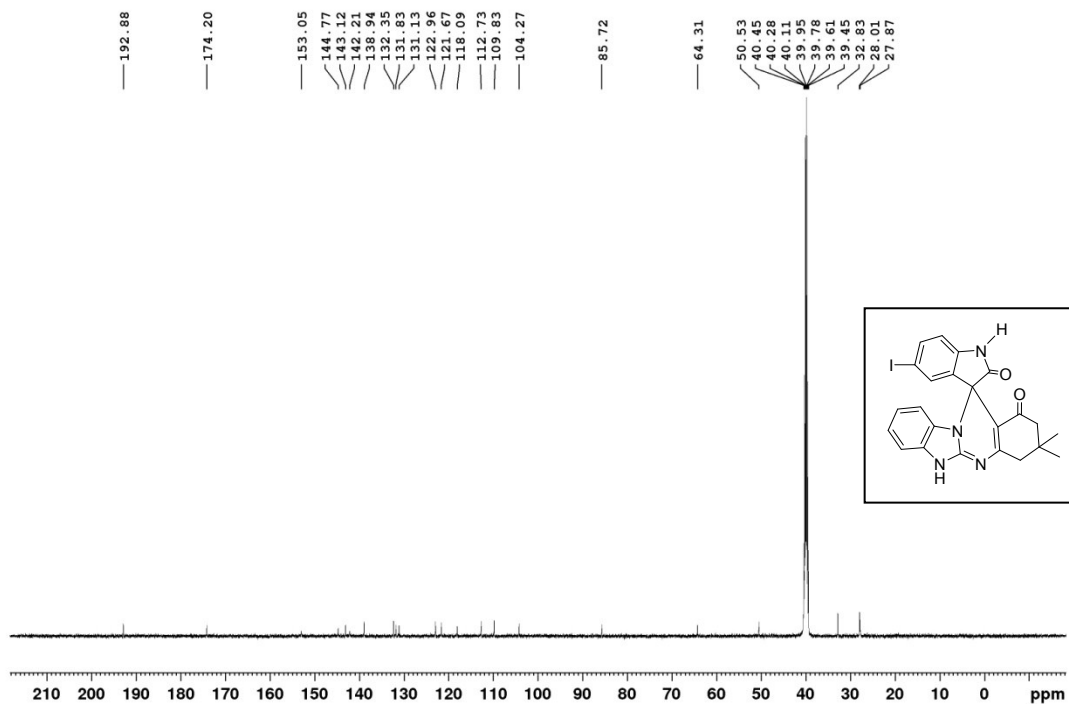

**<sup>13</sup>C NMR spectrum of compound 71**

PM-ADI-4-I-19

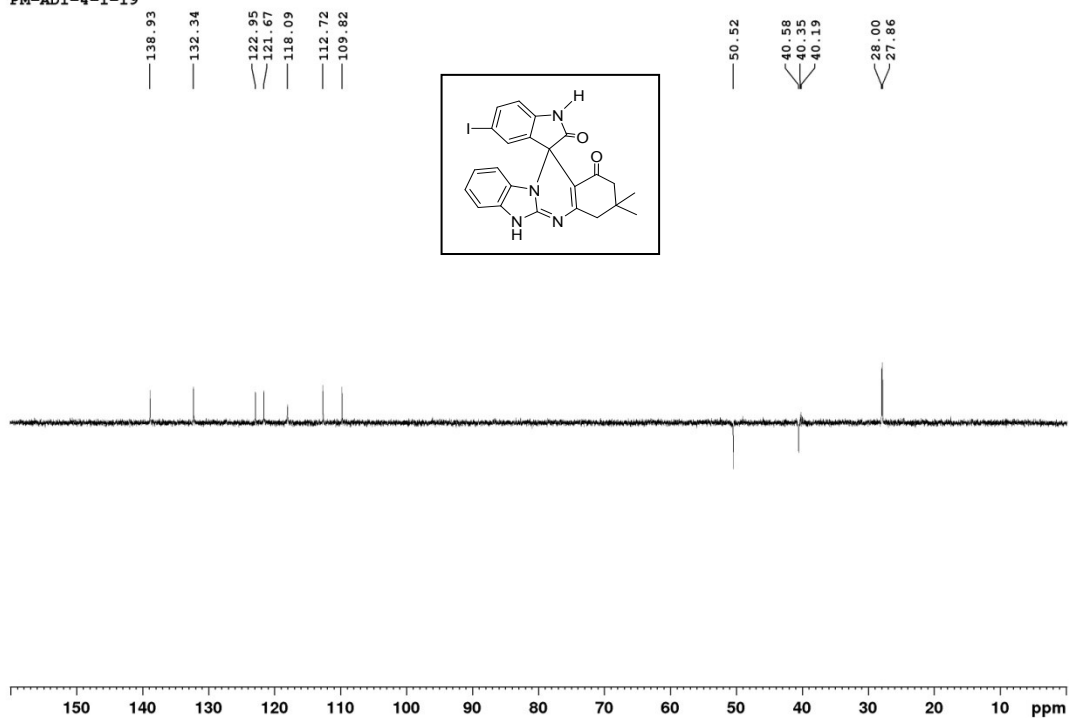

**DEPT-135 NMR spectrum of compound 71**

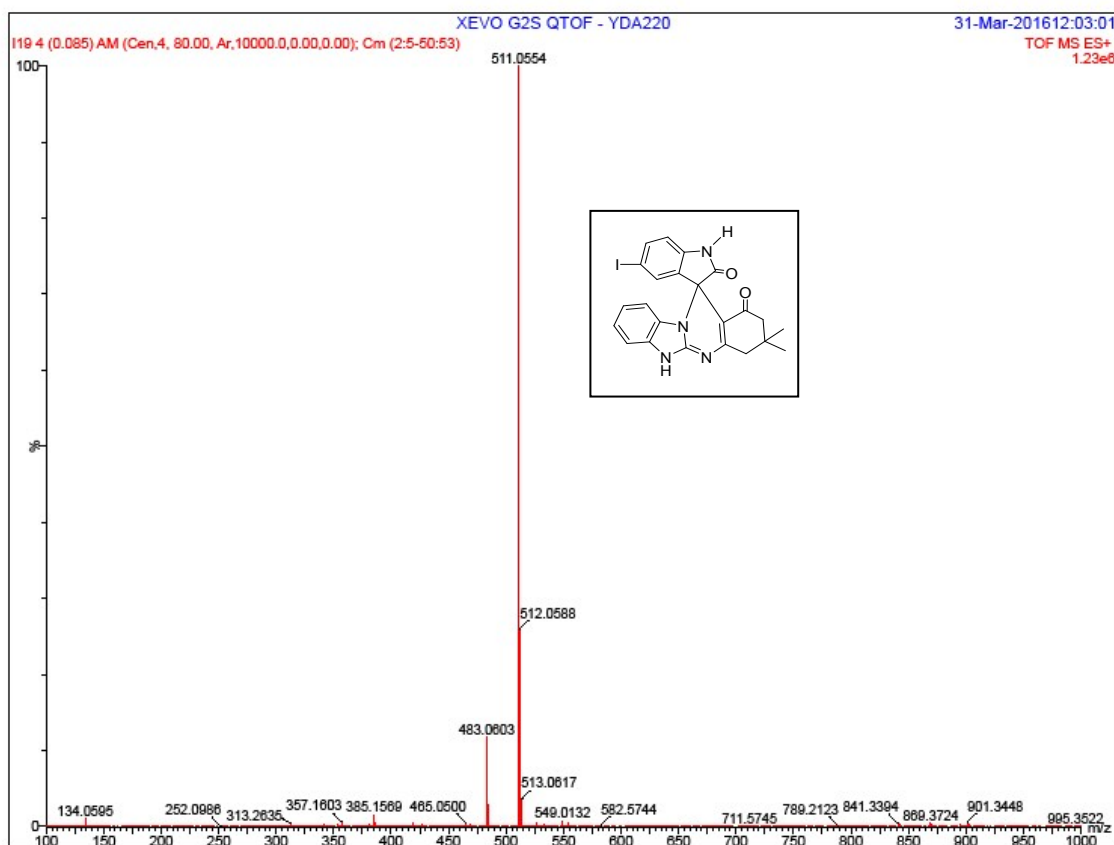

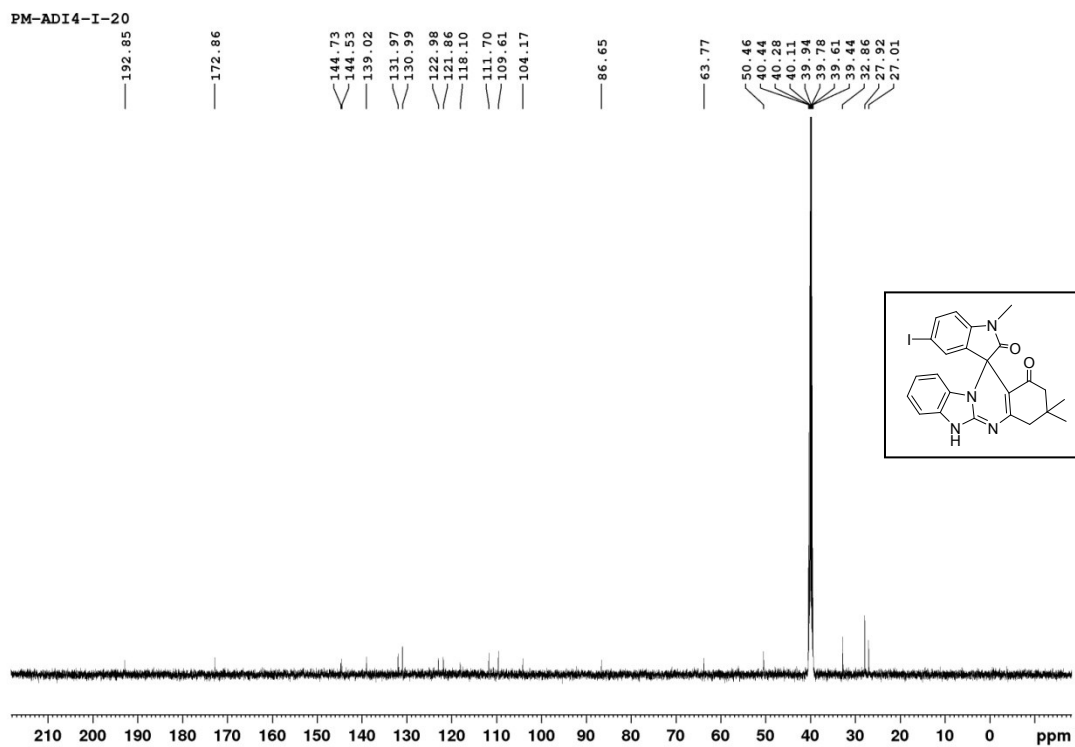

**<sup>13</sup>C NMR spectrum of compound 7m**

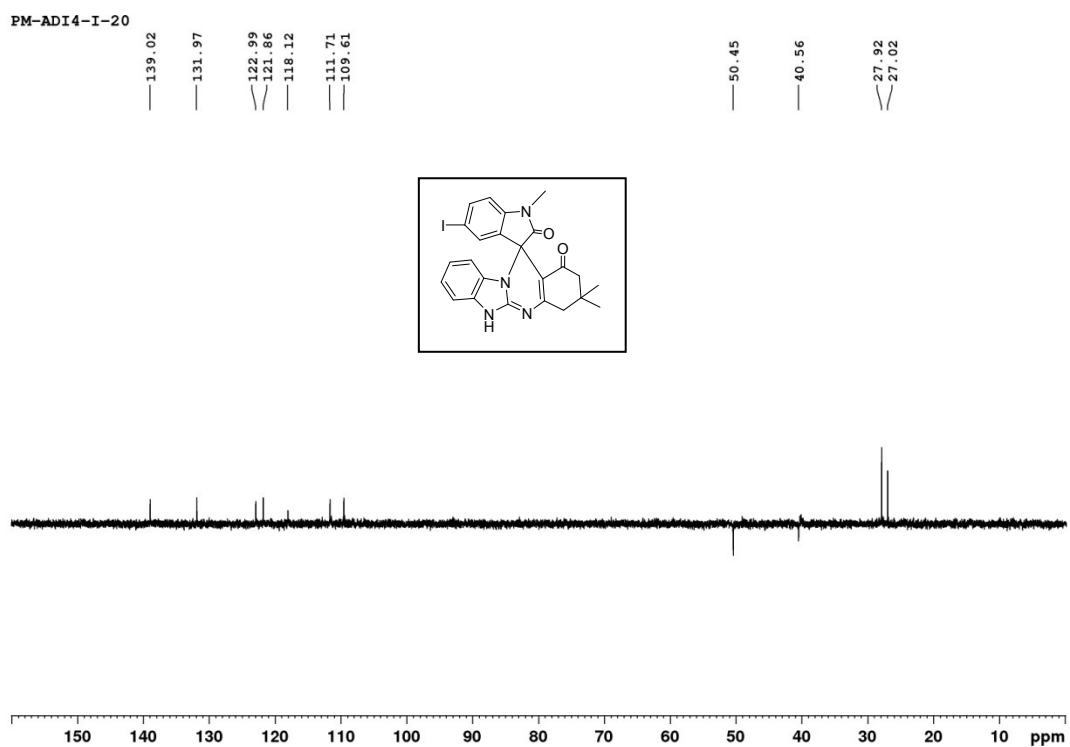

**DEPT-135 NMR spectrum of compound 7m**

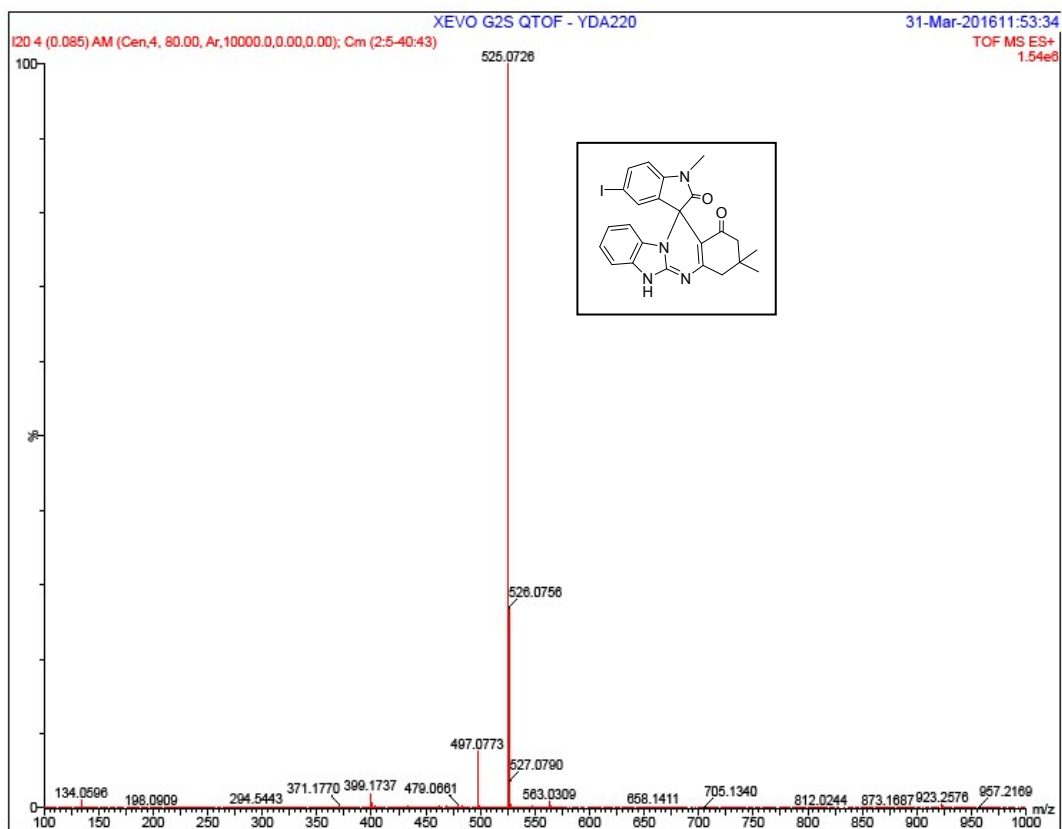

HR

MS spectrum of compound 7m

PM-ADI4-I-21  
 28/3/16

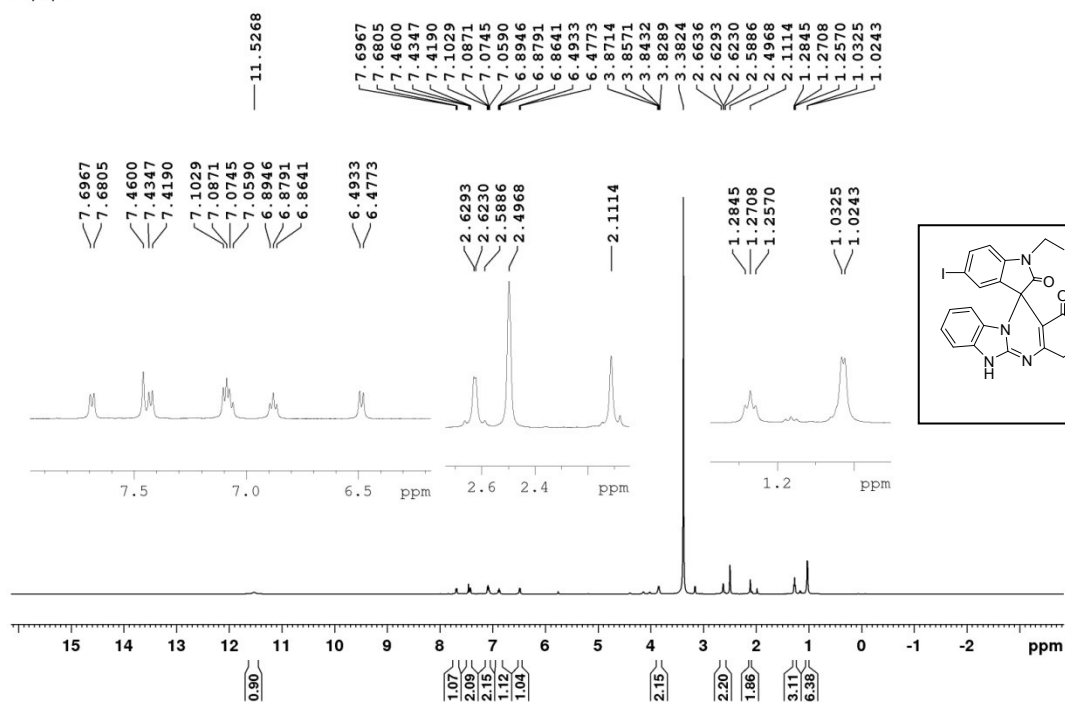

<sup>1</sup>H NMR spectrum of compound 7n

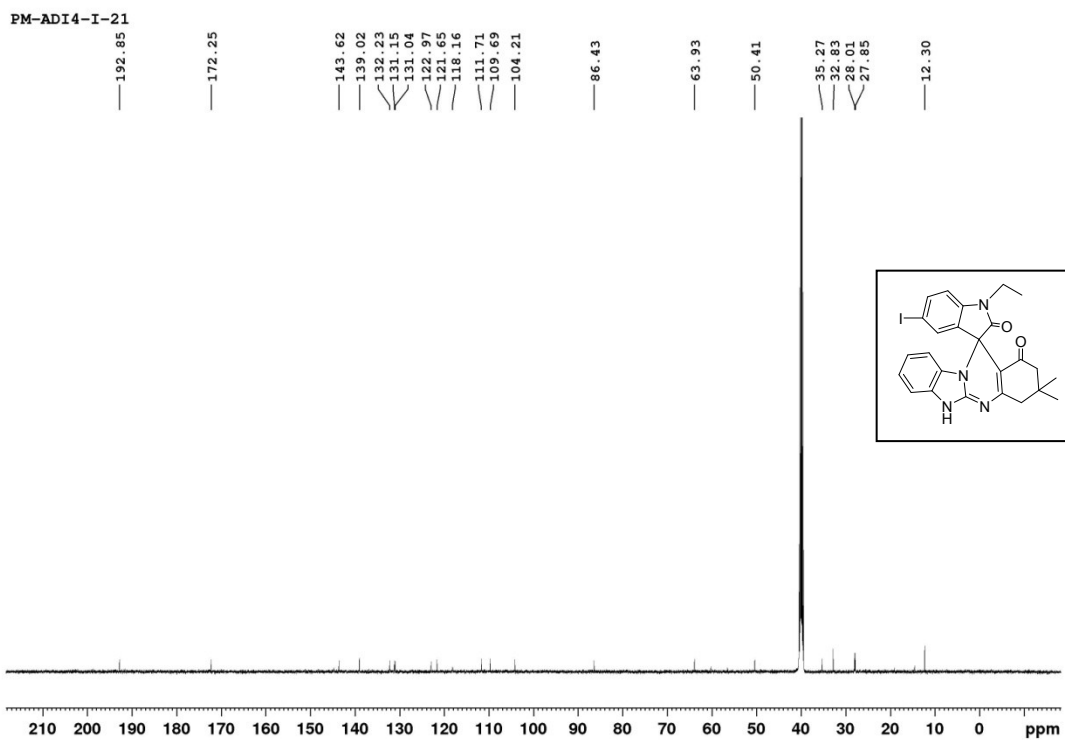

**<sup>13</sup>C NMR spectrum of compound 7n**

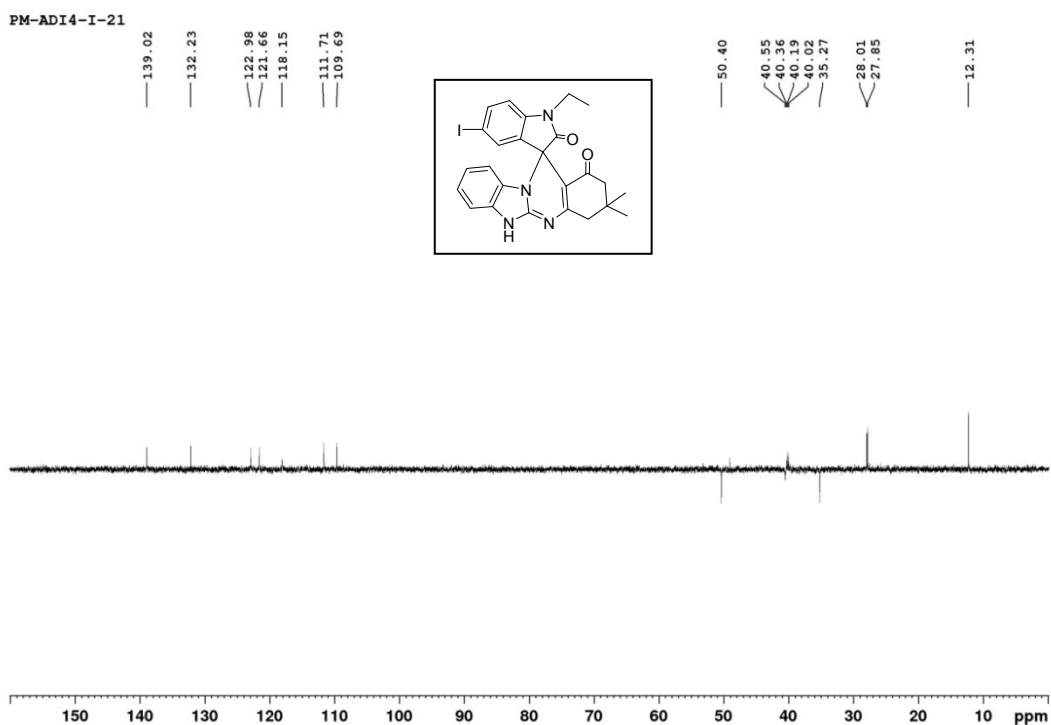

**DEPT-135 NMR spectrum of compound 7n**

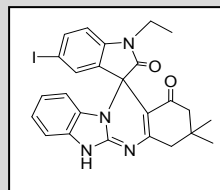

**HRMS spectrum of compound 7n**



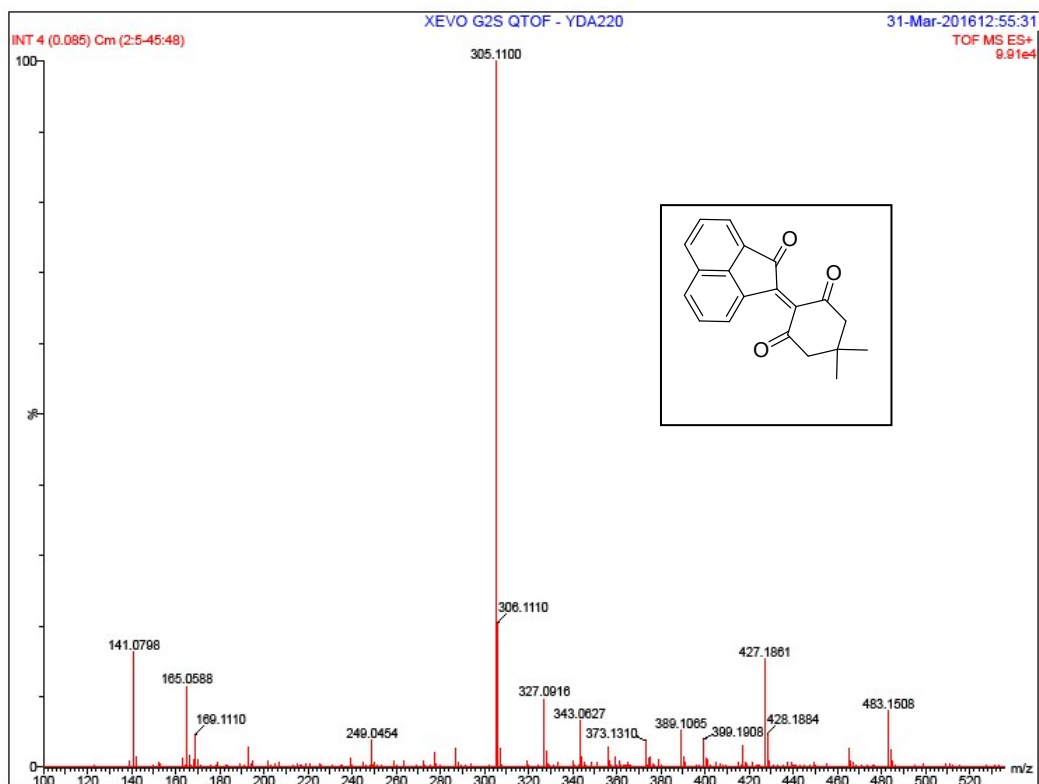

HRMS spectrum of compound 5

## 8. Optimized Transition States

T.S.-I

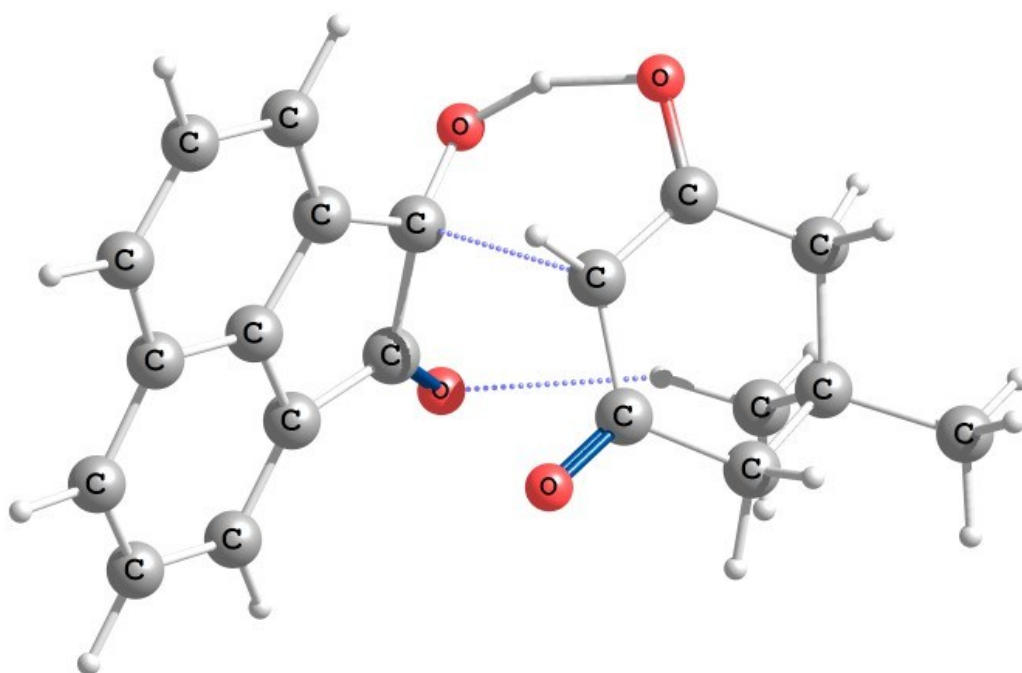

T.S.-III

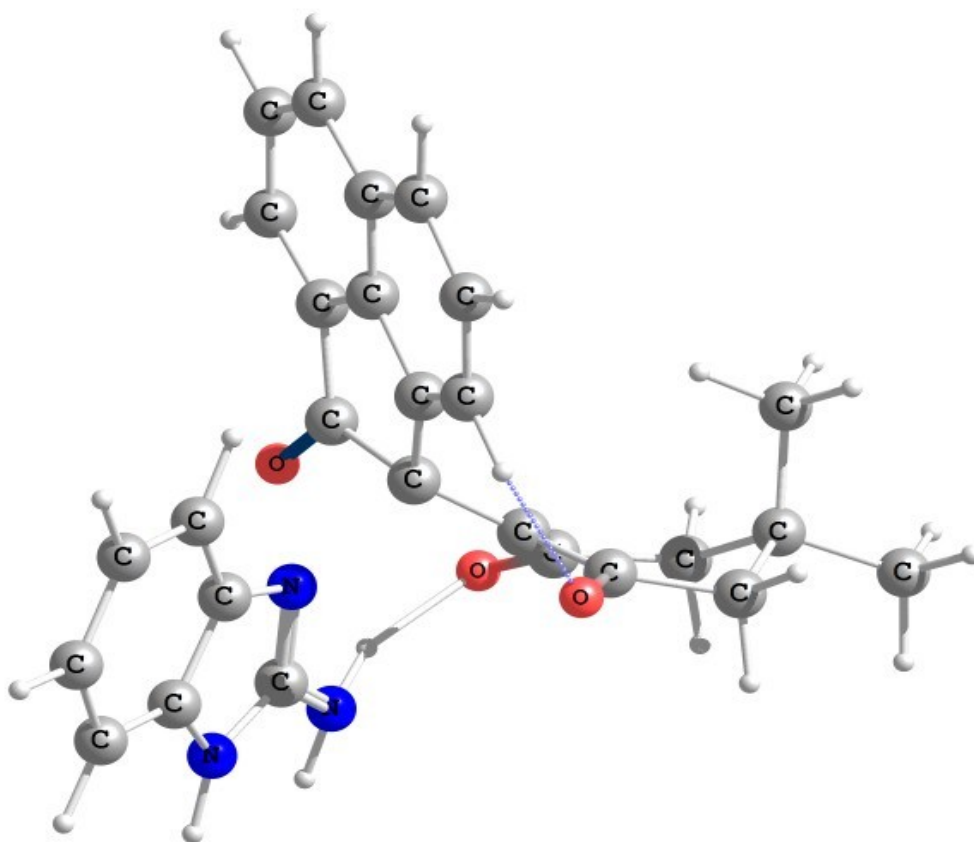

Supplement: c6ra05322j1.pdf [file c6ra05322j1.pdf]
